# 1 Common Marmoset Gut Microbiome Profiles in Health and Intestinal Disease

2 Alexander Sheh<sup>1†,\*</sup>, Stephen C. Artim<sup>1†</sup>, Monika A. Burns<sup>1</sup>, Jose Arturo Molina-Mora<sup>2</sup>, Mary Anne  
3 Lee<sup>1,3</sup>, JoAnn Dzink-Fox<sup>1</sup>, Sureshkumar Muthupalani<sup>1</sup>, James G. Fox<sup>1,\*</sup>

4 <sup>1</sup>*Division of Comparative Medicine, Massachusetts Institute of Technology, Cambridge, Massachusetts*

5 <sup>2</sup>*Centro de Investigación en Enfermedades Tropicales (CIET), Universidad de Costa Rica, San José, Costa Rica*

6 <sup>3</sup>*Department of Biological Sciences, Wellesley College, Wellesley, Massachusetts*

7 \*Corresponding author(s). Email: alexsheh@mit.edu and jgfox@mit.edu

8 †These authors contributed equally to this work

## 9 Abstract

10 Chronic gastrointestinal (GI) diseases are the most common diseases in captive marmosets. The  
11 gut microbiome of healthy (n=91), inflammatory bowel disease (IBD) (n=59), and duodenal  
12 ulcer/stricture (n=23) captive marmosets was characterized. Healthy marmosets exhibited a  
13 “humanized,” *Bacteroidetes*-dominant microbiome. Despite standardized conditions, cohorts  
14 subdivided into *Prevotella*- and *Bacteroides*-dominant groups based on marmoset source. IBD was  
15 highest in a *Prevotella*-dominant cohort while strictures were highest in a *Bacteroides*-dominant  
16 cohort. Stricture-associated dysbiosis was characterized by *Anaerobiospirillum* loss and  
17 *Clostridium perfringens* increases. Stricture tissue presented upregulation of lipid metabolism  
18 genes and increased abundance of *C. perfringens*, a causative agent of GI diseases and intestinal  
19 strictures in humans. IBD was associated with a lower *Bacteroides*:*P. copri* ratio within each  
20 source. Consistent with *Prevotella*-linked diseases, pro-inflammatory genes were upregulated.  
21 This report highlights the humanization of the captive marmoset microbiome and its potential as a

22 “humanized” animal model of *C. perfringens*-induced enteritis/strictures and *P. copri*-associated  
23 IBD.

24 **Keywords:** marmoset, *Prevotella copri*, *Clostridium perfringens*, inflammatory bowel disease,  
25 stricture, microbiome, enteritis

26

27

## 28 Background

29 Over 3.5 million people worldwide are affected by inflammatory bowel disease (IBD), a chronic  
30 gastrointestinal (GI) inflammatory disease triggered by interactions between host, microbes and  
31 the environment<sup>1-5</sup>. Two common forms of IBD are Crohn's disease (CD), which affects the small  
32 and large intestines, and ulcerative colitis (UC), which localizes to the large intestine. Over 200  
33 genomic loci may confer increased IBD risk, with many of these genes associated with regulating  
34 host-microbe interactions<sup>1</sup>. The human GI tract harbors trillions of microorganisms from at least  
35 400 species that compose the intestinal microbiota<sup>6,7</sup>. In healthy individuals, the microbiome  
36 influences many physiological functions such as extracting nutrients, maintaining the gut mucosal  
37 barrier, training immune cells and protecting against pathogens<sup>8</sup>. Dysbiosis occurs due to loss of  
38 beneficial microbes, expansion of pathobionts (opportunistic microbes), or reduction of microbial  
39 diversity. Dysbiosis has been associated with human diseases, including irritable bowel syndrome,  
40 obesity, psoriasis, rheumatoid arthritis, autism spectrum disorders, *Clostridioles difficile* infection  
41 and IBD<sup>8,9</sup>. Changes in the intestinal microbiota observed in IBD patients have included reduction  
42 of short chain fatty acid (SCFA) producing bacteria, reduced alpha diversity, decreased *Firmicutes*  
43 abundance, and increased abundance of facultative anaerobes, *Proteobacteria* and *Bacteroidetes*<sup>2-</sup>  
44 <sup>4,10-12</sup>.

45 In captive common marmosets, GI diseases are the most common and widespread clinical  
46 finding<sup>13,14</sup>. IBD prevalence is reported to be as high as 28-60% in captive marmosets and presents  
47 with diarrhea, weight loss, enteritis, muscle atrophy, alopecia, hypoproteinemia, anemia, elevated  
48 liver enzymes, and a failure to thrive<sup>13,15</sup>. The IBD diagnosis can be refined to chronic lymphocytic  
49 enteritis (CLE) with histologic findings, such as small intestinal localization, shortened villi, crypt  
50 epithelial hyperplasia, and lymphocytic infiltration of the lamina propria<sup>13,14</sup>. Potential marmoset

51 biomarkers include calprotectin and matrix metalloproteinase 9<sup>16,17</sup>, but clinical interventions  
52 involving glucocorticoids, gluten-free diets, Giardia treatment, etc. have yielded mixed results<sup>18–</sup>  
53 <sup>20</sup>. In addition to IBD, a novel chronic GI disease has been described in young adult marmosets  
54 characterized by duodenal dilation or stricture near the major duodenal papilla<sup>21,22</sup>. Clinical signs,  
55 such as diarrhea, weight loss, or poor weight gain, resemble IBD but increased vomiting is also  
56 observed. This syndrome was associated with hypoalbuminemia, hypoglobulinemia,  
57 hypoproteinemia, hypocalcemia (total), elevated alkaline phosphatase, anemia, and in some cases,  
58 leukocytosis<sup>22</sup>. Histologically, duodenal mucosal ulcerations with associated chronic-active  
59 granulocytic and lympho-histiocytic inflammation were observed.

60 As the microbiome has been associated to human GI diseases, factors affecting the microbiome in  
61 non-human primates (NHP) are being explored, such as species, social structure, environment and  
62 diet<sup>23–26</sup>. Captivity and captive diets have been associated with microbial diversity loss, shifts in  
63 the *Firmicutes:Bacteroidetes* ratio, and increased GI disease and mortality<sup>23,26,27</sup>. Dietary  
64 specialists, such as marmosets, are more susceptible to captivity-associated dietary changes<sup>26</sup>.  
65 Marmosets are exudivores that consume large amounts of indigestible oligosaccharides from tree  
66 gums<sup>28</sup>, and may harbor specific gut microbes dedicated to carbohydrate metabolism. Currently,  
67 few reports on the marmoset microbiome are available<sup>29–34</sup>. In this study, we evaluated  
68 microbiome, serum chemistry and complete blood count (CBC) samples from healthy marmosets  
69 (n=91) and marmosets with IBD (n=59) or duodenal ulcer/strictures (n=23), collected during  
70 physical examinations or necropsies over a two-year period. ‘Healthy’ controls were defined as  
71 individuals not clinically diagnosed with IBD or strictures and not receiving chronic drug  
72 treatments during the study period. Unique microbial profiles were associated with the four sources  
73 that populated the MIT colony. We identified changes in both microbial communities and blood

74 parameters that may serve as marmoset biomarkers for IBD and strictures, and propose that  
75 marmosets may be useful animal models to study CD and *Clostridium*-driven GI disorders, such  
76 as duodenal strictures.

## 77 **Results**

### 78 **Microbial Diversity in the Intestinal Microbiota of the Common Marmoset.**

79 303 samples from 91 healthy marmosets were analyzed to determine the normal microbiota (**Table**  
80 **1**). 99% of the average microbial abundance in feces was captured by *Bacteroidetes*, *Firmicutes*,  
81 *Proteobacteria*, *Fusobacteria* and *Actinobacteria* (**Fig. 1a**). The microbiome profile observed in  
82 healthy, MIT marmosets resembles the microbiome observed in human stool with dominance of  
83 the phylum *Bacteroidetes* (average 63.2%), followed distantly by *Firmicutes* and *Proteobacteria*<sup>7</sup>.  
84 As observed in humans<sup>7</sup>, *Bacteroidetes* abundance varied significantly, ranging from 8-86%.  
85 *Bacteroidetes* were predominantly represented by *Bacteroides*, *Prevotella* 9 and *Parabacteroides*.  
86 The most abundant *Firmicutes* were *Megamonas*, *Megasphaera* and *Phascolarctobacterium*.  
87 *Anaerobiospirillum*, *Sutterella* and *Escherichia-Shigella* were the most common *Proteobacteria*.  
88 Notably, *Bifidobacterium* were present in low abundance compared to other reported marmoset  
89 microbiomes<sup>29,30</sup> (**Supp. Table 1**).

### 90 **Source population impacted microbiome diversity**

91 Having established the baseline microbiome for healthy, MIT marmosets, we explored the effects  
92 of age, sex and original source, and found that source strongly influenced composition (**Fig 1b**).  
93 MIT's colony originally received marmosets from four sources (A, B, CLEA and NEPRC), which  
94 we designated MIT<sup>A</sup>, MIT<sup>B</sup>, MIT<sup>CL</sup> and MIT<sup>NE</sup> following importation. Marmosets were housed in  
95 two buildings and provided standardized diet, husbandry and veterinary care. For this study,

96 marmosets were co-housed with same-source animals. Using multiple estimators for alpha  
97 diversity, we noted that species richness estimators significantly differed between healthy  
98 marmosets by source, but not sex or age. MIT<sup>NE</sup> marmosets had higher observed OTUs and Chao1  
99 values compared to other sources ( $P < 0.001$  vs. each source, both metrics) (**Fig 1c, Supp. Fig 1**).  
100 MIT<sup>B</sup> had significantly higher alpha diversity compared to MIT<sup>CL</sup> (observed OTUs,  $P < 0.05$ ;  
101 Chao1,  $P < 0.01$ ) and MIT<sup>A</sup> (Chao1,  $P < 0.05$ ). However, differences were not observed when  
102 accounting for evenness (Shannon diversity or Pielou's evenness). Clustering of samples based on  
103 source (Unweighted UniFrac: PERMANOVA,  $P < 0.001$ ; beta-dispersion, NS) (**Fig 1d**), but not  
104 sex or age, was also observed (**Supp. Fig 2**).

#### 105 ***Bacteroides* and *Prevotella* Define Microbial Communities of Sources**

106 We next identified 63 differentially abundant genera between the 4 sources in the lower gut using  
107 ANCOM (Analysis of Composition of Microbiomes). 13 genera were present at relative  
108 abundances greater than 1% in at least one source (**Supp. Table 2**). High abundance of *Bacteroides*  
109 characterized MIT<sup>NE</sup> and MIT<sup>B</sup> samples, while MIT<sup>CL</sup> and MIT<sup>A</sup> were primarily colonized by  
110 genus *Prevotella* 9 (**Fig. 1b**). The *Bacteroidaceae:Prevotellaceae* ratios for MIT<sup>A</sup>, MIT<sup>CL</sup>, MIT<sup>B</sup>,  
111 and MIT<sup>NE</sup> (0.44, 0.39, 1.23 and 2.17, respectively) emphasize source-associated differences  
112 reflected in these two genera. *Anaerobiospirillum*, another highly abundant genus, represented 8.5-  
113 13.8% of bacterial in three sources but had low numbers in MIT<sup>CL</sup> marmosets (1.5%).

114 Next, we explored the ability of classification models to identify marmoset source based on  
115 microbiome data (**Supp. Fig 3a**). After evaluating multiple models, we developed random forest  
116 (RF) classification models to identify healthy marmosets by source. After ranking ASVs based on  
117 their importance to the model, we iteratively created new models to determine the minimum  
118 number of ASVs required to achieve stability in accuracy, and selected an optimized model using

119 10 ASVs (**Supp. Fig 3b, 3c**). The optimized model achieved an accuracy of 93% with 100%  
120 sensitivity and 95% specificity. The RF model confirmed that despite importation and assimilation,  
121 unique source-specific signature microbiota were retained by cohousing same-source animals.

## 122 **Prevalence of GI disease in MIT-housed Marmosets**

123 To study the effects of GI disease on the microbiome, marmosets were categorized as healthy  
124 (n=91), IBD (n=59) or duodenal stricture (n=23). Strictures were mainly observed in MIT<sup>NE</sup> (21  
125 of 23 cases) with a 26% prevalence in this cohort. IBD was observed throughout the colony with  
126 varied prevalence (MIT<sup>CL</sup>, 55%; MIT<sup>NE</sup>, 29%; MIT<sup>A</sup>, 27%; and MIT<sup>B</sup>, 22%) (**Supp. Table 3**).

## 127 **Effects of Duodenal Strictures on the microbiome and blood analysis**

128 As strictures predominantly affected MIT<sup>NE</sup>, we next investigated the effects of duodenal strictures  
129 on the marmoset microbiome in this cohort. “Progressors,” marmosets that had or developed  
130 strictures, had markedly different microbiomes compared to “non-progressors,” animals that  
131 remained healthy or developed other diseases (**Fig. 2a, Supp. Fig. 4a**). On average, a 32% decrease  
132 in *Bacteroides* was observed in stricture cases (35.8% abundance in non-progressors vs. 24.5% in  
133 progressors), which decreased the *Bacteroides:Prevotella 9* ratio from 3.1 in non-progressors to  
134 1.4 in progressors. *Anaerobiospirillum*, the second most abundant genus in non-stricture  
135 marmosets (13%), decreased to 4.6% in stricture cases. Concurrently, a 50% increase in  
136 *Megamonas* was observed in progressors (**Fig. 2a**). ANCOM identified *Anaerobiospirillum* and  
137 *Clostridium sensu stricto 1* as differentially expressed, with *Clostridium sensu stricto 1* increases  
138 measured in progressors.

139 Despite changes in microbial composition, no changes in alpha diversity were observed using  
140 multiple metrics. We then optimized a 9 ASV RF model that minimized the number of ASVs while

141 maximizing accuracy of stricture classification (**Fig. 2b, Supp. Fig. 4b, 4c**). Of these 9 ASVs, 3  
142 *Anaerobiospirillum* ASVs, as well as *Bacteroides* and *Parabacteroides* ASVs, decreased in  
143 progressors. Increases were observed in ASVs from *Bifidobacterium*, *Clostridium sensu stricto 1*,  
144 *Oribacterium*, and *Megamonas*. The receiver operating characteristic (ROC) curve for this model  
145 had an area under the curve (AUC) of 0.82 (**Fig. 2c**) with an accuracy of 85%, a sensitivity of  
146 100% and a specificity of 45%.

147 As ANCOM and our model highlighted the role of *Clostridium sensu stricto 1*, we investigated its  
148 presence in strictures. *Clostridium sensu stricto 1* encompasses *Clostridium* species *C. tetani*, *C.*  
149 *botulinum*, *C. kluyveri*, *C. acetobutylicum*, *C. novyi*, *C. perfringens* and *C. beijerinckii*, which are  
150 considered pathogenic and indicate less healthy and less diverse microbiota<sup>35</sup>. Using representative  
151 sequences assigned to *Clostridium sensu stricto 1* ASVs, we determined that 232,156 (69%) reads  
152 shared >99% identity over the 370 bp sequence with *C. perfringens*. Remaining reads matched  
153 with *C. baratii* (19%), *C. colicanis* (7%) and unknown *Clostridium* species (6%). Importantly,  
154 ASV256, which increased 6-fold in progressors, shared 100% identity with *C. perfringens*. We  
155 then sought to confirm the presence of this organism by culture and 16S rRNA Sanger sequencing  
156 of clinical isolates. *C. perfringens* was isolated in 4 of 9 duodenum samples from marmosets with  
157 histologically confirmed strictures. *C. baratii* or *C. sardiniense*, a rare causative agent of  
158 botulism<sup>36</sup>, was isolated from 1 of 9 samples. As the pathogen was isolated at the stricture site, we  
159 analyzed the microbiome in duodenal samples from stricture (n=17) and non-stricture cases (n=12)  
160 to determine if increased gut abundance reflected a duodenal infection. *Clostridium sensu stricto*  
161 *1* was observed at greater than 1% abundance in 76% of strictures (13/17) but only in 16% of non-  
162 stricture cases (2/12). In 8 stricture cases, the bacterium was the most abundant genus with  
163 abundances ranging from 37-87%. Interestingly, one non-stricture sample with 30% abundance of



164 *Clostridium sensu stricto* I had duodenal pathology characterized by mild duodenal mucosal  
165 congestion (**Fig 2d**).

166 Next, we developed RF models using serum chemistry profiles or CBC data to categorize stricture  
167 progressors and non-progressors. 4 serum chemistry parameters (total protein, lipase, GGT and  
168 amylase) classified progressors and non-progressors with 84.8% accuracy, a sensitivity of 76.5%,  
169 a specificity of 93.8% and AUC of 0.89 (**Fig 2c, Supp. Fig. 4d-f**). Total protein and GGT  
170 decreased in stricture cases, while lipase and amylase increased. Using CBC data, the RF classifier  
171 used HCT, HGB, RBC, RDW, MCH and lymphocyte percentage to identify strictures with an  
172 accuracy of 82.8%, sensitivity of 89.4%, a specificity of 75% and AUC of 0.83 (**Fig. 2c, Supp.**  
173 **Fig. 4g-i**). All variables, except RDW, decreased in strictures. Of note, weight was excluded from  
174 these models as severe weight loss is observed, which masked the contribution of other parameters.  
175 Exclusion of weight data did not decrease the predictive power of serum chemistry or CBC models.

### 176 **Effects of IBD on the microbiome and blood analysis**

177 While strictures were observed predominantly in MIT<sup>NE</sup>, IBD was diagnosed in the four sources.  
178 “Progressors” were diagnosed with or developed IBD during the study, while “non-progressors”  
179 remained healthy or developed non-IBD diseases. Across the colony, microbiome richness  
180 decreased in IBD progressors (Chao1, P<0.001; Observed OTUs, P<0.001) but these changes were  
181 not observed when accounting for evenness (Shannon’s index and Pielou’s evenness) (**Fig. 3a**).  
182 We used PCA to determine if progressors converged at a common dysbiotic state (**Supp. Fig. 5a**).  
183 Similar to human IBD studies<sup>3,5,37</sup>, overall differences in the gut microbiota were observed but no  
184 individual microbes were consistently associated with IBD across all sources. Even in disease,  
185 community structures were source-dependent. However, positive, IBD-associated shifts along the  
186 first principal component (PC) were observed within sources (**Fig. 3b, Supp. Fig. 5a**). Changes in

187 PC1 position were significantly different between healthy and IBD cases in the entire dataset (All,  
188  $P < 0.001$ ), and in 3 of 4 sources (MIT<sup>B</sup>,  $P < 0.01$ ; MIT<sup>CL</sup>,  $P < 0.001$ ; MIT<sup>A</sup>,  $P < 0.05$ ; MIT<sup>NE</sup>,  $P = 0.6$ )  
189 (**Fig 3b**). While no single dysbiotic IBD state existed, source-specific, healthy states could become  
190 source-specific, IBD states through similar perturbations of the microbiome.

191 To identify IBD-associated patterns observed in the dataset and within source-specific subsets, we  
192 examined ASVs correlated with PC1. Five *Prevotellaceae* ASVs (*Prevotella 9* and unclassified  
193 genera) and 3 *Megasphaera* ASVs were positively correlated with PC1, while 5 *Parabacteroides*  
194 ASVs and 3 *Bacteroides* ASVs were anti-correlated to PC1. Due to their importance in our analysis  
195 and the human gut microbiome<sup>7,38</sup>, we examined the relationship between *Bacteroides* and  
196 *Prevotella 9* in marmoset IBD. Using BLAST, 99.93% of *Prevotella 9* reads matched *P. copri*  
197 with a >99% identity. *Bacteroides* reads matched multiple species including *B. plebeius* (48.3%),  
198 *B. vulgatus* (16.8%), *B. uniformis* (6.4%), *B. dorei* (4.3%), *B. massiliensis* (3.2%), *B.*  
199 *thetaitaomicron* (1.9%), *B. ovatus* (1.9%) and *B. coprocola* (1%). Decreases in *Bacteroides* were  
200 observed in IBD progressors, while *Prevotella 9* remained level or increased (**Fig. 3c**). Overall,  
201 the ratio of average *Bacteroides* abundance to average *Prevotella 9* abundance was 1.83 in non-  
202 progressors and 1.07 in IBD progressors, yielding a non-progressor/progressor ratio of 1.7. Similar  
203 non-progressor/progressor ratios were observed in all subsets, implying increased *P. copri* levels  
204 relative to *Bacteroides* spp. in marmoset IBD (**Fig. 3c**). We also developed 4 RF models to classify  
205 progressors and non-progressors using data from the entire colony, MIT<sup>B</sup>, MIT<sup>CL</sup> and MIT<sup>NE</sup>  
206 (MIT<sup>A</sup> excluded due to insufficient n). The top 25 ASVs in each model were compared, and 8  
207 ASVs shared by at least 3 models were identified (**Supp. Table 4**). ASVs belonged to *Sutterella*  
208 (3), *Megamonas* (2), *Bacteroides*, *Asteroleplasma*, and *Prevotella 9*. Overlap in genera was  
209 determined by collapsing the 4 lists of ASVs by genus. Half of these ASVs belonged to 5 genera:

210 *Bacteroides* (n=20), *Sutterella* (n=10), *Megamonas* (n=8), *Bifidobacterium* (n=7) and *Prevotella*  
211 *9* (n=7). These results suggest that shifts in *Bacteroides*, *P. copri*, *Megamonas* and *Sutterella* are  
212 observed in IBD progressors relative to source-specific, healthy states.

213 Unlike the microbiome data, source-dependent clustering was not observed in serum chemistry or  
214 CBC PCA plots of IBD marmosets (**Supp. Fig. 5b-c**). Therefore, RF classifiers were trained solely  
215 on IBD status. The serum chemistry RF model used 7 variables (calcium, GGT, albumin, A:G  
216 ratio, amylase, cholesterol, and alkaline phosphatase), and had an accuracy of 77%, a sensitivity  
217 of 79%, a specificity of 76% and AUC of 0.85 (**Fig. 3d, Supp. Fig. 5d**). The optimized CBC RF  
218 model used HGB, RBC, RDW, MPV and neutrophil percentage, and had an accuracy of 77%, a  
219 sensitivity of 73%, a specificity of 83% and AUC of 0.81 (**Fig. 3d, Supp. Fig. 5e**). In these models,  
220 calcium, hemoglobin and RBC were the most important in classifying IBD.

### 221 **Effects of GI disease on gene expression of the small intestine**

222 We tested whether strictures or IBD significantly altered marmoset transcriptomic profiles using  
223 RNA sequencing (RNAseq) on samples from IBD (n=3) or stricture (n=3) marmosets. Marmosets  
224 with strictures presented with gross thickening, duodenal stricture or ulceration (0.5-1cm aboral to  
225 the major duodenal papilla). Duodenal tissue evaluated was immediately distal to the lesion  
226 (“stricture”) or in an equivalent anatomic region in IBD animals (“non-stricture”). While IBD  
227 animals served as non-stricture controls, thickened intestines were observed grossly, and  
228 duodenitis was noted. As the most affected intestinal site in IBD<sup>13</sup>, we selected the jejunum to  
229 evaluate IBD effects. Unlike the IBD duodenum, the jejunum of stricture cases presented minimal  
230 pathology<sup>22</sup>, and were used as “non-IBD,” jejunum controls.

231 Comparing stricture and non-stricture duodenums, we identified 1,183 differentially expressed  
232 genes (DEG) (FDR <0.05) (**Fig 4a, Supp. Table 5**). To perform Gene ontology (GO) analysis,

233 marmoset genes with official names were matched to *Homo sapiens* genes to retrieve Entrez IDs  
234 with associated GO categories. Analysis of this gene subset identified 903 DEGs with GO  
235 annotations. The top 15 biological processes (BP) with significant enrichment are listed in **Table**  
236 **2** (complete list – **Supp. Table 6**). Stricture samples enriched BP sets involved with intestinal  
237 absorption, and lipid metabolism, localization and transport (**Fig 4b, Supp. Fig. 6a**). Stricture  
238 upregulated genes encompassed cholesterol-associated genes including apolipoproteins (*APOB*,  
239 *APOA1* and *APOA4*), transport genes (*ABCG5*, *ABCG8*, *GRAMD1B*, and *STARD3*), metabolic  
240 genes (*DGATI*, *CYP11A1*, and *CYP27A1*) and binding/absorption genes (*SOAT2*, *NPC1L1* and  
241 *SCARB1*) (**Supp. Table 5a**). Other lipid-associated genes upregulated by stricture included genes  
242 associated with fatty acid binding proteins (*FABP1* and *FABP2*), peroxisomes (*PPARA*, *ABCD1*,  
243 *ACAA1* and *EPHX2*), ketogenesis (*HMGCS2*) and lipid synthesis (*GPAM*, *SREBF1*, *SCAP*, and  
244 *ACACB*). Enriched cellular membrane GO sets shared these lipid-associated genes due to  
245 functional overlap (**Supp. Table 6, Supp. Fig. 6b**). Interestingly, immunity-associated genes were  
246 more highly expressed in non-stricture duodenums (**Fig 4b, Supp. Fig. 7**), possibly due to the  
247 enteritis observed in IBD marmosets. These genes included antimicrobial responses (*LCN2*, *LYZ*,  
248 *MUC20*), toll-like receptors (*TLR2* and *TLR4*), superoxide-generating NADPH oxidase activity  
249 (*NOX1* and *DUOX2*), killer cell lectin-like receptor genes (*KLRB1*, *KLRC1*, *KLRD1*, and *KLRF1*),  
250 and chemokine activity and receptor binding (*CXCL1*, *CXCL10*, *TFF2* and *PF4*) (**Supp. Table**  
251 **5b**). The transcriptional profile implies the activity of natural killer (NK) cells, neutrophils and  
252 MHC class I protein complex binding.

253 1,984 DEGs were identified when comparing jejunums from IBD and non-IBD marmosets (**Fig**  
254 **4c, Supp. Table 7**) following the exclusion of an IBD sample that did not cluster with other  
255 samples (**Supp. Fig. 8**). GO annotations were assigned to 1,586 DEGs, and the top 15 BP are

256 summarized in **Table 3a** (complete list - **Supp. Table 8**). As observed in non-stricture duodenum  
257 (IBD) samples, the jejunum of IBD animals enriched GOs associated with host immunity, such as  
258 T cell activation, adaptive immune responses, and regulation of immune response (**Fig 4d, Supp.**  
259 **Fig. 9**). As observed in the non-stricture duodenum, genes associated with killer cell lectin-like  
260 receptors (*KLRB1*, *KLRC1*, *KLRC2*, *KLRF1*, and *KLRK1*) and antimicrobial responses (*LCN2*,  
261 *LYZ*, and *MUC20*) were upregulated in the jejunum of IBD marmosets. Genes involved in the  
262 adaptive immunity and T cell activation (*EOMES*, *PRF1*, *IFNG*, *FYN*, *CD160*, *CD244*, *CD3G*,  
263 *TBX21*, *CD27*, *PTPRC*, and *IL18RI*) had increased expression in IBD samples. (**Supp. Table 7**).  
264 In non-IBD animals, top GOs associated with homeostatic functions, such as synaptic signaling,  
265 development, and muscle contraction (**Table 3b, Supp. Fig. 10**).

266

## 267 **Discussion**

268 GI diseases are the most prevalent clinical disease in captive common marmosets<sup>13,14,39</sup>, but the  
269 role of the microbiome is largely unknown. Recent literature demonstrates that NHP captivity  
270 affects bacterial composition, reduces alpha diversity, and alters host responses to disease<sup>23,26,40</sup>.  
271 In captivity, NHP microbiomes lose distinctive, wild microbiota and become dominated by  
272 *Prevotella* and *Bacteroides*, the most abundant genera in the modern human gut microbiome<sup>7,23,38</sup>.  
273 In the largest marmoset microbiome study to date, our data supports the hypothesis that captivity  
274 humanizes the primate microbiome, as *Bacteroides* and *Prevotella 9* were the most abundant  
275 genera with levels similar to those observed in human feces<sup>7,38</sup>. In humans, *Prevotella* and  
276 *Bacteroides* abundances are anticorrelated, signifying that competitive advantages in metabolism  
277 determine the dominant bacteria<sup>41,42</sup>. *Prevotella* increases have been associated with high-fiber,  
278 plant-based diets and non-industrialized populations, while *Bacteroides* increases were linked to

279 Westernized populations with diets rich in animal fat and protein<sup>41,42</sup>. Diets influence levels of  
280 fibers, fermentation products, SCFA and bile acids (BA), which determine bacterial  
281 communities<sup>42</sup>. As our marmosets were fed a standardized diet, dietary differences cannot account  
282 for the *Prevotella*- and *Bacteroides*-dominant profiles observed stably in our colony. Most bacteria  
283 observed were acetate- or propionate-producers, such as *Bacteroides*, *Prevotella*,  
284 *Anaerobiospirillum*, *Phascolarctobacterium*, *Megamonas*, and *Megasphaera*, with a low  
285 abundance of butyrate producers, such as *Lachnospiraceae*<sup>43</sup>. However, *Megasphaera* has been  
286 known to produce butyrate under specific conditions<sup>33,44</sup>. Inter-institutional differences greatly  
287 affect marmoset microbiomes, as previous studies report marmoset gut microbiota dominated by  
288 *Actinobacteria*<sup>29,30</sup>, *Firmicutes*<sup>33,34</sup>, *Proteobacteria*<sup>24,45,46</sup> and *Bacteroidetes*<sup>31,32,46</sup>. At the  
289 Biomedical Primate Research Centre (BPRC) (Rijswijk, the Netherlands), *Actinobacteria*,  
290 represented by *Bifidobacterium* and *Collinsella*, was the most abundant phylum (66%), while  
291 *Bacteroides* and *Prevotella* represented <5% of the microbiome each<sup>29</sup>. BPRC marmosets have  
292 access to outdoor and indoor enclosures, as well as food enrichment, such as insects and gums,  
293 several times a week<sup>29</sup>. We hypothesize that increased environmental exposure and enrichment  
294 promotes a wild-like microbiome, rich in bifidobacteria that help metabolize oligosaccharide-rich  
295 tree gums, a common food source for wild marmosets<sup>45,47</sup>. High abundances of *Actinobacteria* are  
296 observed in wild callitrichids, but not in captive and semi-captive marmosets<sup>24</sup>. Unexpectedly,  
297 Ross et al. also reported high *Bifidobacterium* levels in marmosets housed within a specific-  
298 pathogen free (SPF) barrier facility and at the Southwest National Primate Resource Center  
299 (SNPRC)<sup>30</sup>. In contrast to the BPRC, SPF marmosets fed exclusively irradiated feed, nuts, seeds  
300 and dried fruits had median *Bifidobacterium* abundances of 17%<sup>30</sup>. This was much higher than the  
301 non-SPF parent colony at SNPRC, which had median *Bifidobacterium* frequencies of 4% and high

302 levels of *Fusobacterium*<sup>30</sup>. However, a follow-up report from the barrier facility showed bacterial  
303 shifts with an increased *Bacteroidetes* abundance (35%) and a slight decrease in  
304 *Bifidobacteriaceae* (12%)<sup>31</sup>. Similar to our study, few age-related changes in the microbiome were  
305 observed<sup>31</sup>. In a colony with a microbiome similar to the MIT profile, microbiome synchronization  
306 occurred within a year in imported marmosets, characterized by expansion of *Bacteroidetes*<sup>46</sup>.  
307 Imported cohorts retained unique features following microbiome synchronization<sup>46</sup>, supporting  
308 our findings that source-specific microbiomes persist despite standardization of husbandry and  
309 diet. These studies demonstrate that inter-institutional differences can promote stable microbiomes  
310 in clinically healthy animals across a large range of bacterial compositions. In other NHP, wild-  
311 like microbiota may prevent captivity-associated illnesses<sup>23</sup>. The resilience to perturbations of  
312 different bacterial compositions in marmosets is unknown. Understanding and manipulating the  
313 marmoset microbiome may help prevent disease, and due to their importance as research models  
314 in neuroscience, aging, and toxicology, having marmosets with “humanized” microbiota may  
315 better represent the human condition.

316 In this study, we evaluated a marmoset colony with a “humanized” microbiota<sup>48</sup> and compared the  
317 microbiota of clinically healthy individuals with marmosets with two GI diseases. While captivity  
318 increases susceptibility to GI disease, we observed source-specific differences in disease  
319 prevalence. MIT<sup>NE</sup> marmosets had the highest *Bacteroidaceae* abundance (37%) and the lowest  
320 *Prevotellaceae* levels (17%), and were most susceptible to strictures, a novel GI disease in  
321 marmosets<sup>21,22</sup>. This duodenal syndrome was found in 21.9% of necropsy cases in an institution<sup>21</sup>,  
322 while MIT<sup>NE</sup> marmosets had a 26% prevalence. Clinical signs include vomiting, bloating, weight  
323 loss and a palpable thickening of the duodenum that can be visualized through radiography and  
324 ultrasound<sup>21,22</sup>. Stricture-associated dysbiosis featured reductions in *Bacteroides* and



325 *Anaerobiospirillum*, and *Megamonas* increases. Our analysis of strictures highlighted the  
326 importance of decreases in *Anaerobiospirillum* and increases in *Clostridium sensu stricto 1*. While  
327 *Anaerobiospirillum* has been previously reported in healthy marmosets, dogs and cats<sup>45,49</sup>, these  
328 bacteria may cause GI disease in humans<sup>49</sup>. However, *Anaerobiospirillum* was present in high  
329 abundances in our healthy marmosets, and reduced levels were seen in disease.

330 As *C. perfringens* was detected at higher levels in the duodenal lesions of diseased animals by  
331 culture and sequencing, we propose that *C. perfringens* is a potential causative agent of duodenal  
332 disease in marmosets. *C. perfringens* is a known GI pathogen that can encode multiple toxins  
333 (alpha, beta, epsilon, iota, perfringolysin O, and enterotoxin)<sup>35</sup>. In marmosets and other NHP, *C.*  
334 *perfringens* can cause gas gangrene and gastric dilatation syndrome<sup>50-52</sup>. Of note, *C. perfringens*-  
335 induced gas gangrene was reported in the institution that first reported duodenal strictures<sup>50</sup>. In the  
336 United Kingdom, *C. perfringens* is one of the top 5 causes of foodborne death<sup>53</sup>, and has been  
337 linked to diarrhea, *Clostridial* necrotizing enteritis (CNE), necrotizing enterocolitis (NEC), UC  
338 and enterotoxemia in humans and other mammals<sup>35,54</sup>. CNE is a necrotizing inflammation of the  
339 small intestine that can induce mild diarrhea or severe abdominal pain, vomiting and ulcers<sup>35</sup>. NEC  
340 predominantly affects infants due to intestinal immaturity or dysbiosis<sup>35,54</sup>. While these symptoms  
341 match the clinical presentation of duodenal strictures in marmosets, they are non-specific.  
342 However, intestinal strictures developed in 11-29.5% of NEC infants in both small and large  
343 intestines and could occur up to 20 months post-diagnosis<sup>55,56</sup>. Based on the site of *C. perfringens*  
344 infection at the junction of the duodenum and the common bile duct, we hypothesize that BA  
345 deregulation due to dysbiosis or antibiotic treatment may facilitate *C. perfringens* infection.  
346 Antibiotic usage in infants has been linked with increased NEC risk<sup>57</sup>, and antibiotics are  
347 commonly prescribed to treat NHP GI diseases. Furthermore, *C. perfringens* was overrepresented



348 in dogs with chronic enteropathy, an IBD-like disease, and bacterial abundance was regulated by  
349 secondary BAs, deoxycholic acid and lithocholic acid, that are produced by gut bacteria<sup>58,59</sup>.

350 In addition to the role of *C. perfringens*, our serum chemistry and CBC-based RF models were  
351 highly sensitive in classifying strictures. Decreased total protein levels are often observed with GI  
352 disease and may indicate poor digestion/absorption. The importance of amylase and lipase in our  
353 stricture model is supported by clinical findings of cholecystitis and secondary pancreatitis<sup>22</sup>.  
354 Secondary pancreatitis, attributed to extension from the duodenal ulcer, was observed in 15 of 17  
355 cases scored<sup>22</sup>. In the CBC-based model, HCT, HGB, RBC, RDW, and MCH relate to red blood  
356 cell function and suggested anemia. Anemia, a common finding in marmosets with strictures and  
357 IBD<sup>15,22</sup>, is also a risk factor for NEC in humans<sup>60</sup>. Interestingly, transcriptomic analysis of  
358 strictures showed enrichment of lipid metabolism and intestinal absorption genes, which may  
359 reflect enterocyte damage and is consistent with lipidomic alterations induced by *C. perfringens*  
360 alpha-toxin, a phospholipase C<sup>61</sup>. Increased expression of *FABP1* and *FABP2* was observed. These  
361 genes encode for liver and intestinal fatty-acid binding proteins (LFABP and IFABP), respectively,  
362 and are often used as biomarkers of GI diseases, including NEC<sup>57</sup>. To our knowledge, correlations  
363 of gut *FABP2* levels with serum IFABP levels have not been described, but we hypothesize that  
364 increased expression might be a compensatory mechanism triggered by enteritis. While increased  
365 inflammatory responses were not observed due to the lack of healthy control tissue, based on the  
366 *C. perfringens* infection, development of enteritis, anemia and strictures and deregulation of lipid  
367 metabolism, we believe marmosets could be developed as a model to investigate the mechanisms  
368 of bacterially-driven CNE/NEC.

369 In contrast, a unique microbial signature for IBD was not evident. Consistent with human studies,  
370 marmoset IBD decreased alpha diversity<sup>3,11,37</sup>. Human IBD is characterized by the loss of health-

371 associated genera, such as *Roseburia*, *Faecalibacterium*, *Eubacterium*, *Ruminococcus* and  
372 *Subdoligranulum*<sup>2,3,37,62</sup>, but these bacteria have not been found in high abundance in marmosets<sup>29–</sup>  
373 <sup>31</sup>. Other potentially beneficial taxa in humans that have been observed in marmosets include  
374 *Bifidobacterium*, *Bacteroides*, *Collinsella*, and *Phascolarctobacterium*<sup>3,62</sup>. Increases in  
375 *Lactobacillus*, *Ruminococcus gnavus*, *Enterobacteriaceae*, *Pasteurellaceae*, *Veillonellaceae*, and  
376 *Fusobacteriaceae* have been associated with IBD<sup>3,37,62</sup>. While convergence to a single dysbiotic  
377 IBD state was not observed, multiple, source-specific states were associated with IBD. Within  
378 each source population, IBD progressors had higher average abundances of *P. copri* and  
379 *Megamonas*, as well as decreased abundance of *Bacteroides*, relative to controls. Our RF models  
380 also highlighted *Sutterella*, a bacteria associated with negative fecal microbiota transplantation  
381 outcomes, shorter remission periods in UC patients<sup>63,64</sup>, and its ability to dampen immune  
382 responses<sup>65</sup>. *Megamonas*, along with *B. plebeius*, deregulate BA metabolism in CD patients<sup>66</sup>,  
383 which could cause dysbiosis and opportunistic pathogen infections. However, while *Megamonas*  
384 increases were observed, *Bacteroides* decreased in marmoset IBD. Most *Bacteroides* reads  
385 matched *B. plebeius*, a non-*B. fragilis* group species<sup>67</sup>. *B. plebeius* ASVs were the most abundant  
386 in the two *Bacteroides*-dominated cohorts, and only 20% of *Bacteroides* reads matched members  
387 of the *B. fragilis* group, the most frequently isolated and virulent species in clinical specimens<sup>68</sup>.  
388 Furthermore, the role of the *B. fragilis* group in IBD is inconclusive, as they both modulate  
389 immunity and cause infections<sup>3,68–70</sup>.

390 While the effects of *Bacteroides* and *Prevotella* spp. in IBD patients have not been  
391 understood<sup>3,71,72</sup>, *Prevotella* have been considered inflammophilic pathobionts, commensal  
392 bacteria known to thrive in inflammatory environments and promote inflammatory diseases, such  
393 as periodontitis, bacterial vaginosis, rheumatoid arthritis (RA), and metabolic disorders<sup>73–75</sup>.

394 *Prevotella*, including *P. copri*, activate TLR2, elicit specific IgA and IgG responses and promote  
395 the release of IL-1, IL-8, IL-6, IL-17, IL-23, and CCL20, which leads to neutrophil recruitment,  
396 reduced T helper 2 (Th2) cells and induction of Th17 cells<sup>73-77</sup>. In the gut, *Prevotella* has been  
397 linked to diarrhea, HIV-induced gut dysbiosis, irritable bowel syndrome and more severe colitis<sup>78-</sup>  
398 <sup>80</sup>. In a small study, higher levels of *Prevotella* were observed in marmosets with IBD compared  
399 to controls<sup>46</sup>. Furthermore, models of RA and colitis have shown that transfer of *Prevotella*- or *P.*  
400 *copri*-rich microbiota to mice transmitted disease phenotypes<sup>74,77,78</sup>. A possible mechanism could  
401 be linked to cycles of expansion and relaxation observed in *P. copri* abundance in healthy  
402 individuals, but absent in IBD patients<sup>5</sup>. Constant *P. copri* signals might promote chronic  
403 inflammation, but natural control of *P. copri* in the microbiome might prevent disease-causing  
404 chronic inflammatory states. In our study, IBD-associated enteritis upregulated pro-inflammatory  
405 immune responses in the duodenum and jejunum. Multiple genes associated with NK cell  
406 functions were upregulated by IBD, including genes associated with high cytolytic effector  
407 activity, cytotoxicity and IFN- $\gamma$  production (*CD244*, *CD160*, *IL18R1*, *FYN*, and *IFNG*)<sup>81,82</sup>. In  
408 addition to *IFNG*, genes associated with Th1 cells (*TBX21*, *CCR2*, *CCR5*, and *IL2RB*) were also  
409 upregulated. In humans, killer immunoglobulin receptor (KIR) polymorphisms have linked NK  
410 cells with CD<sup>83</sup>. Further studies are needed to determine if *P. copri* causes enteritis and IBD in  
411 marmosets via NK cells.

412 This study is the largest evaluation of the captive marmoset microbiome, and is the first to  
413 systematically compare clinically healthy marmosets and marmosets with two GI disorders. The  
414 common marmoset may be a useful model to investigate *C. perfringens*-associated enteritis and  
415 intestinal strictures, as well as *P. copri*-mediated IBD. As observed in humans, a range of stable  
416 microbiome profiles may exist in clinically healthy marmosets. Better understanding of these

417 profiles, the effects of diet and husbandry, and their inherent robustness to insults and disease will  
418 be helpful in promoting animal health, developing better models of human disease and  
419 understanding how to modulate microbial communities.

## 420 **Materials and Methods**

### 421 *Animals.*

422 Common marmosets (*Callithrix jacchus*) were housed at the Massachusetts Institute of  
423 Technology in Cambridge, MA, from marmosets sourced from the New England Primate Research  
424 Center (NEPRC), an international primate center (CLEA Japan Inc.), and two biotech companies  
425 (A and B). Subsequently, the four sources will be referred to as MIT<sup>NE</sup>, MIT<sup>CL</sup>, MIT<sup>A</sup>, and MIT<sup>B</sup>.  
426 All animals were housed in pairs or family groups within two vivaria at MIT, an AAALAC  
427 International accredited facility. Of the animals evaluated in this survey, 85 were male and 88 were  
428 female. All marmosets included in this study were on an animal use protocol approved by the MIT  
429 Institutional Care and Use Committee (IACUC).

430 The animal holding room temperature was maintained at 74.0 +/- 2°F with a relative humidity of  
431 30 – 70%. The light cycle was maintained at a 12:12h light:dark cycle. Marmosets were housed in  
432 cages composed of stainless-steel bars and polycarbonate perches with the following dimensions:  
433 30” W x 32” D x 67” H). Each cage had a nest box made of polycarbonate attached the outside of  
434 the cage. Other cage furniture present in the cages included hammocks, hanging toys, and  
435 manzanita wood branches. Foraging enrichment in the form of dried acacia gum-filled branches  
436 and forage board were provided weekly. Cages were removed for sanitization on a biweekly  
437 rotation.

438 All animals received a base chow diet of biscuits (Teklad New World Primate Diet 8794). Initially,  
439 biscuits were soaked in water for at least 20 minutes, but the practice was then changed to a pour-  
440 on/pour-off soak only. About halfway through the two-year period encompassing this study,  
441 biscuit prep protocol reverted to the original practice of a 20-minute soak to alleviate any concerns  
442 that soaking duration could be contributing to the development of duodenal ulcers. In addition to  
443 the base chow, a cafeteria-style supplemental offering of fruits, vegetables, and additional protein  
444 sources including hard-boiled eggs, mealworms, cottage cheese or ZuPreem (Premium Nutritional  
445 Products, Inc., Mission, KS).

446 On a semiannual basis, preventative health physical exams were performed on all colony  
447 animals. Rectal swabs and fecal samples were collected and screened for potentially pathogenic  
448 bacteria (including *Salmonella* spp., *Shigella* spp, beta-hemolytic *E.coli*, *Klebsiella* spp., and  
449 *Campylobacter* spp.) and parasites (including *Enterobius* spp., *Entamoeba* spp., *Giardia* spp.,  
450 *Taenia* spp., and *Cryptosporidium* spp.). Intradermal testing for *Mycobacterium tuberculosis* was  
451 performed semiannually as well. All animals derived from progenitor stock were negative for  
452 squirrel monkey cytomegalovirus, *Saimiriine herpesvirus 1*, *Saimiriine herpesvirus 2*, and  
453 measles virus. Complete blood count and serum chemistry analysis were performed on an annual  
454 basis and during diagnostic workup of clinical cases. Hematology analysis was performed by the  
455 MIT DCM diagnostic laboratory using a HemaVet 950 veterinary hematology analyzer (Drew  
456 Scientific, Oxford, CT). Serum chemistry analysis was performed by Idexx Laboratories  
457 (Westbrook, ME). Serum chemistry and complete blood counts data were collected from the  
458 clinical records from the MIT colony. Fecal (n = 223) and rectal swab (n=342) were collected from  
459 common marmosets (*Callithrix jacchus*) (n = 565 samples, 173 individuals) between 2016-2018.

460 *Bacterial Culture Methods*

461 Stricture samples containing duodenal tissue and duodenal contents were collected from animals  
462 during necropsies performed by clinical veterinarians and veterinary pathologists.  
463 Representative sections of major organs were collected, fixed in 10% neutral buffered formalin,  
464 embedded in paraffin, sectioned at 5  $\mu\text{m}$ , and stained using hematoxylin and eosin (HE) for  
465 scoring by a boarded veterinary pathologist. Stricture samples were flash frozen in vials containing  
466 Brucella broth in 20% glycerol and frozen at  $-80^{\circ}\text{C}$ . The tissues were thawed in an anaerobic  
467 atmosphere (10%  $\text{CO}_2$ , 10%  $\text{H}_2$ , 80%  $\text{N}_2$ ), and were homogenized with freeze medium with tissue  
468 grinders. The homogenate was divided into the following aliquots. For aerobic culture, the  
469 homogenates were plated onto chocolate agar, blood agar, MacConkey agar, and Brucella Broth  
470 medium containing 10% FCS. The plates were incubated at  $37^{\circ}\text{C}$  in 5%  $\text{CO}_2$  for 24-48 hours. For  
471 anaerobic culture, the homogenates were plated onto pre-reduced Brucella Blood Agar plates  
472 (BBL) and inoculated into thioglycollate broth. The cultures were incubated at  $37^{\circ}\text{C}$  in an  
473 anaerobic chamber (Coy Lab Products) with mixed gas (10%  $\text{CO}_2$ , 10%  $\text{H}_2$ , 80%  $\text{N}_2$ ) for 48 hours.  
474 For microaerobic culture to detect the growth of *Helicobacter* spp., the homogenates were plated  
475 onto selective antibiotic impregnated plates (50  $\mu\text{g}/\text{ml}$  amphotericin B, 100  $\mu\text{g}/\text{ml}$  vancomycin,  
476 3.3  $\mu\text{g}/\text{ml}$  polymyxin B, 200  $\mu\text{g}/\text{ml}$  bacitracin, and 10.7  $\mu\text{g}/\text{ml}$  nalidixic acid)<sup>84</sup> and Brucella Blood  
477 Agar plates after passing through 0.65  $\mu\text{m}$  syringe filter. The plates were placed into a vented jar  
478 filled with mixed gas (10%  $\text{CO}_2$ , 10%  $\text{H}_2$ , 80%  $\text{N}_2$ ) and incubated at  $37^{\circ}\text{C}$  for up to 3 weeks. The  
479 plates were checked every 2-3 days for growth. Aliquots of the homogenates were also used for  
480 DNA extraction. All bacterial strains isolated from the different culture conditions were identified  
481 by 16s rRNA sequencing.

482

483 *16S microbiome profiling.*

484 Fecal DNA was extracted using the DNeasy PowerLyzer PowerSoil Kit, and DNA was amplified  
485 using universal primers of F515 (GTGYCAGCMGCCGCGGTAA) and R926  
486 (CCGYCAATTYMTTTRAGTTT) to target the V4 and V5 regions of bacterial 16S rRNA fused  
487 to Illumina adaptors and barcode sequences as described previously.<sup>85</sup> Individual samples were  
488 barcoded and pooled to construct the sequencing library, followed by sequencing with an Illumina  
489 MiSeq instrument to generate pair-ended 300 × 300 reads. Sequencing quality was inspected using  
490 FastQC<sup>86</sup>. Reads were processed using QIIME 2-2018.6 within the MicrobiomeHelper v. 2.3.0  
491 virtual box<sup>85,87</sup>. Briefly, primer sequences were trimmed using the cutadapt plugin<sup>88</sup>. Forward and  
492 reverse reads were truncated at 243 and 195 bases, respectively, prior to stitching and denoising  
493 reads into amplicon sequence variants (ASV) using DADA2. Samples with fewer than 7,500 reads  
494 were excluded. ASVs present in fewer than 3 samples and with less than 24 counts were also  
495 excluded. A total of 1085 ASVs were retained after filtering. Taxonomic classification was  
496 assigned using the custom 16S V4/V5 region classifier based on the SILVA 132 database (SSU  
497 Ref NR 99)<sup>89</sup>. Phylogenetic trees, composition, alpha rarefaction, beta diversity metrics and  
498 ANCOM (Analysis of Composition of Microbiome)<sup>90</sup> were evaluated using built-in QIIME2  
499 functions<sup>91</sup>. Microsoft Excel and R (v 3.6.3 at <http://www.R-project.org/>) were used to perform  
500 statistical analyses and graphically represent data. Additionally R libraries ggplot2 (2.2.1)<sup>92</sup>,  
501 caret<sup>93</sup>, vegan<sup>94</sup>, pROC<sup>95</sup>, and gtools<sup>96</sup> were used to model microbiome data. Classifiers were  
502 trained on 80% of the samples and the discovered signatures were used to predict the populations  
503 on the remaining 20% of samples (testing). We analyzed the *Bacteroides/Prevotella* abundance  
504 ratio by taking the ratio of the averaged *Bacteroides* abundance and the averaged *Prevotella*  
505 abundance.

506

507 *RNAseq*

508 Tissues were collected from the duodenum and jejunum from marmosets with either stricture or  
509 IBD during necropsies performed by clinical veterinarians and veterinary pathologists. In stricture  
510 cases, duodenal samples were distal of the site of stricture (n=3), and in IBD cases, the same region  
511 of the duodenum presented with mild thickening based on gross observations (n=3). In IBD cases,  
512 the jejunum presented with increased thickening (n=3), while in stricture cases, the jejunum was  
513 grossly normal (n=3). Tissues were flash frozed in liquid nitrogen and stored at -80°C. RNA was  
514 extracted using TRIzol reagent according to manufacturer's instructions (Thermo Fisher  
515 Scientific). Total RNA was shipped on dry ice to Arraystar, Inc. (Rockville, MD) for quality  
516 control, rRNA depletion and sequencing on an Illumina HiSeq4000. FASTA files and the NCBI  
517 RefSeq GTF files for *Callithrix jacchus* based on the March 2009 (WUBSC 3.2/calJac3) assembly  
518 were obtained from the UCSC Genome browser<sup>97</sup>. Raw sequencing reads were mapped to an index  
519 built from *C. jacchus* FASTA files using Rsubread<sup>98</sup>. Feature counts were obtained from the bam  
520 files using annotated exons in the *C. jacchus* GTF files. Analysis was then performed using  
521 edgeR<sup>99,100</sup>. Lowly expressed exons were removed using a cutoff of 10 counts per million (CPM).  
522 Normalization was performed using the Trimmed Mean of M-values (TMM) method.  
523 Multidimensional scaling (MDS) plots and heatmaps were used to evaluate grouping of biological  
524 samples. Data was fitted using the glmQLFit function that uses a generalized linear model (GLM)  
525 implementing a quasi-likelihood (QL) fitting method. Quasi-likelihood F-tests were performed to  
526 test for differential expression based on False Discovery Rate (FDR) adjusted P-values of 0.05. To  
527 retrieve Gene Ontology (GO) classifications, *C. jacchus* genes that matched *Homo sapiens* gene  
528 names were assigned both the *C. jacchus* and *Homo sapiens* Entrez IDs. GO analysis was  
529 performed using limma<sup>101</sup>, AnnotationDbi<sup>102</sup>, GO.db<sup>103</sup>, topGO<sup>104</sup>, mygene<sup>105</sup> and org.Hs.eg.db.



530 Data was visualized using ggplot2, gplots, Rgraphviz<sup>106</sup>, colorspace<sup>107</sup> and ggVennDiagram<sup>108</sup>.  
531 Analysis of the IBD dataset demonstrated that the expression profile of one sample differed from  
532 the remaining samples and was excluded from the analysis presented.

### 533 **Data availability**

534 RNAseq data is available under NCBI GEO accession number GSE156839. Microbiome data is  
535 available under NCBI BioProject PRJNA659472.

### 536 **Acknowledgements**

537 This work was supported in part by a grant from the MIT McGovern Institute, NIH grant T32  
538 OD010978 and by the National Institute of Environmental Health Sciences of the NIH under award  
539 P30-ES002109.

### 540 **Author contributions**

541 Conception and design: AS, SCA, MAB, SM, JGF. Data acquisition, analysis and interpretation:  
542 AS, SCA, MAB, JAM, MAL, JD, SM. Manuscript: AS, SCA, JGF

### 543 **Captions**

544 Figure 1. A) Gut microbiome profiles of healthy, common marmosets at the phylum level exhibit  
545 a *Bacteroidetes*-dominant and human-like microbiome. B) Averaged relative abundances at the  
546 genus level show differences associated with source but few differences based on sex or age. C)  
547 Observed OTUs were increased in MIT<sup>NE</sup> vs. all sources and MIT<sup>B</sup> compared to MIT<sup>A</sup> and MIT<sup>CL</sup>,  
548 but metrics involving evenness, such as Shannon's diversity index, showed no difference. D)  
549 PCoA plot using Unweighted UniFrac metric shows clustering of microbiome profiles based on  
550 marmoset source. \*,  $P < 0.05$ ; \*\*,  $P < 0.01$  and \*\*\*,  $P < 0.001$ .

551 Figure 2. A) Microbiome composition of samples at the genus level and pie charts with average  
552 bacterial abundances of stricture progressors and non-progressors show dysbiosis associated with  
553 stricture characterized by decreased *Bacteroides* and *Anaerobiospirillum* and increased  
554 *Megamonas*. B) Nine ASVs identified by a random forest model that can correctly classify stricture  
555 and non-stricture samples with a 85% accuracy. C) Area under the curve (AUC) of receiver  
556 operating characteristic (ROC) curves for random forest models using microbiome, serum  
557 chemistry or complete blood count show strong performance of models in classifying strictures  
558 and non-strictures. D) Relative abundance of *Clostridium sensu stricto 1* reads in duodenal tissues  
559 is increased in stricture cases compared to non-stricture cases.

560 Figure 3. A) Decreased richness was observed in IBD marmosets (Observed OTUs and Chao1)  
561 compared to non-IBD marmosets similar to what is observed in humans. B) Increases in PC1  
562 relative to source-specific, non-IBD controls were observed in 3 of 4 sources. C) *Bacteroides* and  
563 *Prevotella 9* levels are shown by source and IBD status. A lower overall and source-specific  
564 *Bacteroides:Prevotella 9* ratio is observed in IBD cases regardless of source-specific differences  
565 in abundances of these two genera. D) AUC of ROC for random forest models using serum  
566 chemistry and CBC show strong performance of models in classifying IBD progressors and non-  
567 progressors. \*,  $P < 0.05$ ; \*\*,  $P < 0.01$  and \*\*\*,  $P < 0.001$ .

568 Figure 4. A) Differentially expressed genes (DEG)(FDR <0.05) in the duodenum of non-stricture  
569 and stricture cases. B) Gene ontology (GO) sets enriched in stricture cases show upregulation of  
570 lipid metabolism, transport and localization. Non-stricture cases have enrichment of immune  
571 processes, possibly due to underlying pathology caused by IBD. C) DEG (FDR <0.05) in the  
572 jejunum of non-IBD and IBD cases. D) IBD samples are enrich GO sets associated with immunity  
573 and immune cell activation.

574 Table 1. Demographics of samples used classified by Sex, Age, Sample Type and Source. Columns  
575 break down samples by disease status.

576 Table 2. Top Gene Ontology sets observed in RNAseq analysis of stricture progressors and non-  
577 progressors

578 Table 3. Top Gene Ontology sets observed in RNAseq analysis of IBD progressors and non-  
579 progressors

## 580 References

- 581 1. Huang H, Fang M, Jostins L, et al. Fine-mapping inflammatory bowel disease loci to  
582 single-variant resolution. *Nature*. 2017;547(7662):173-178. doi:10.1038/nature22969
- 583 2. Morgan XC, Tickle TL, Sokol H, et al. Dysfunction of the intestinal microbiome in  
584 inflammatory bowel disease and treatment. *Genome Biol*. 2012;13(9). doi:10.1186/gb-  
585 2012-13-9-r79
- 586 3. Gevers D, Kugathasan S, Denson LA, et al. The treatment-naive microbiome in new-onset  
587 Crohn's disease. *Cell Host Microbe*. 2014;15(3):382-392.  
588 doi:10.1016/j.chom.2014.02.005
- 589 4. Kostic AD, Xavier RJ, Gevers D. The microbiome in inflammatory bowel disease:  
590 Current status and the future ahead. *Gastroenterology*. 2014;146(6):1489-1499.  
591 doi:10.1053/j.gastro.2014.02.009
- 592 5. Lloyd-Price J, Arze C, Ananthakrishnan AN, et al. Multi-omics of the gut microbial  
593 ecosystem in inflammatory bowel diseases. *Nature*. 2019;569(7758):655-662.  
594 doi:10.1038/s41586-019-1237-9
- 595 6. Ley RE, Peterson DA, Gordon JI. Ecological and evolutionary forces shaping microbial  
596 diversity in the human intestine. *Cell*. 2006;124(4):837-848.  
597 doi:10.1016/j.cell.2006.02.017
- 598 7. Huttenhower C, Gevers D, Knight R, et al. Structure, function and diversity of the healthy  
599 human microbiome. *Nature*. 2012;486(7402):207-214. doi:10.1038/nature11234
- 600 8. Rajilić-Stojanović M. Function of the microbiota. *Best Pract Res Clin Gastroenterol*.  
601 2013;27(1):5-16. doi:10.1016/j.bpg.2013.03.006
- 602 9. Durack J, Lynch S V. The gut microbiome: Relationships with disease and opportunities  
603 for therapy. *J Exp Med*. 2019;216(1):20-40. doi:10.1084/jem.20180448
- 604 10. Frank DN, St. Amand AL, Feldman RA, Boedeker EC, Harpaz N, Pace NR. Molecular-  
605 phylogenetic characterization of microbial community imbalances in human inflammatory  
606 bowel diseases. *Proc Natl Acad Sci U S A*. 2007;104(34):13780-13785.  
607 doi:10.1073/pnas.0706625104
- 608 11. Willing BP, Dicksved J, Halfvarson J, et al. A pyrosequencing study in twins shows that  
609 gastrointestinal microbial profiles vary with inflammatory bowel disease phenotypes.  
610 *Gastroenterology*. 2010;139(6). doi:10.1053/j.gastro.2010.08.049
- 611 12. Martinez-Medina M, Aldeguer X, Lopez-Siles M, et al. Molecular diversity of *Escherichia*  
612 *coli* in the human gut: New ecological evidence supporting the role of adherent-invasive  
613 *E. coli* (AIEC) in Crohn's disease. *Inflamm Bowel Dis*. 2009;15(6):872-882.  
614 doi:10.1002/ibd.20860
- 615 13. Ludlage E, Mansfield K. Clinical care and diseases of the common marmoset (*Callithrix*  
616 *jacchus*). In: *Comparative Medicine*. Vol 53. ; 2003:369-382.
- 617 14. David JM, Dick EJ, Hubbard GB. Spontaneous pathology of the common marmoset

- 618 (Callithrix jacchus) and tamarins (Saguinus oedipus, Saguinus mystax). *J Med Primatol.*  
619 2009;38(5):347-359. doi:10.1111/j.1600-0684.2009.00362.x
- 620 15. Baxter VK, Shaw GC, Sotuyo NP, et al. Serum albumin and body weight as biomarkers  
621 for the antemortem identification of bone and gastrointestinal disease in the common  
622 marmoset. *PLoS One.* 2013;8(12):e82747. doi:10.1371/journal.pone.0082747
- 623 16. Nakashima E, Okano Y, Niimi K, Takahashi E. Detection of calprotectin and apoptotic  
624 activity in the colon of marmosets with chronic diarrhea. *J Vet Med Sci.*  
625 2013;75(12):1633-1636. doi:10.1292/jvms.13-0257
- 626 17. Yoshimoto T, Niimi K, Takahashi E. Serum matrix metalloproteinase 9 (MMP9) as a  
627 biochemical marker for wasting marmoset syndrome. *J Vet Med Sci.* 2016;78(5):837-843.  
628 doi:10.1292/jvms.15-0675
- 629 18. Otovic P, Smith S, Hutchinson E. The use of glucocorticoids in marmoset wasting  
630 syndrome. *J Med Primatol.* 2015;44(2):53-59. doi:10.1111/jmp.12159
- 631 19. Schroeder C, Osman AA, Roggenbuck D, Mothes T. IgA-gliadin antibodies, IgA-  
632 containing circulating immune complexes, and IgA glomerular deposits in wasting  
633 marmoset syndrome - PubMed. *Nephrol Dial Transplant.* 1999;14(8):1875-1880.
- 634 20. Kuehnel F, Mietsch M, Buettner T, Vervuert I, Ababneh R, Einspanier A. The influence  
635 of gluten on clinical and immunological status of common marmosets (Callithrix jacchus).  
636 *J Med Primatol.* 2013;42(6):300-309. doi:10.1111/jmp.12055
- 637 21. Mineshige T, Inoue T, Yasuda M, Yurimoto T, Kawai K, Sasaki E. Novel gastrointestinal  
638 disease in common marmosets characterised by duodenal dilation: a clinical and  
639 pathological study. *Sci Rep.* 2020;10(1):1-10. doi:10.1038/s41598-020-60398-4
- 640 22. Artim SC, Sheh A, Burns MA, Fox JG, Muthupalani S. Abstracts of Scientific  
641 Presentations 2019 AALAS National Meeting: P139 A Syndrome of Duodenal Ulceration  
642 with Strictures in a Colony of Common Marmosets (Callithrix jacchus). *J Am Assoc Lab*  
643 *Anim Sci.* 2019;58(5):607-726.
- 644 23. Clayton JB, Vangay P, Huang H, et al. Captivity humanizes the primate microbiome. *Proc*  
645 *Natl Acad Sci U S A.* 2016;113(37):10376-10381. doi:10.1073/pnas.1521835113
- 646 24. Malukiewicz J, Cartwright RA, Dergam JA, et al. The Effects of Host Taxon,  
647 Hybridization, and Environment on the Gut Microbiome of Callithrix Marmosets. *bioRxiv.*  
648 Published online July 22, 2019:708255. doi:10.1101/708255
- 649 25. Hicks AL, Lee KJ, Couto-Rodriguez M, et al. Gut microbiomes of wild great apes  
650 fluctuate seasonally in response to diet. *Nat Commun.* 2018;9(1):1-18.  
651 doi:10.1038/s41467-018-04204-w
- 652 26. Frankel JS, Mallott EK, Hopper LM, Ross SR, Amato KR. The effect of captivity on the  
653 primate gut microbiome varies with host dietary niche. *Am J Primatol.* 2019;81(12).  
654 doi:10.1002/ajp.23061
- 655 27. Malukiewicz J, Cartwright RA, Dergam JA, et al. The Effects of Host Taxon,  
656 Hybridization, and Environment on the Gut Microbiome of Callithrix Marmosets. *bioRxiv.*

- 657 Published online 2019. doi:10.1101/708255
- 658 28. Rylands AB, de Faria D. Habitats, feeding ecology, and home range size in the genus  
659 Callithrix. In: Rylands AB, ed. *Marmosets and Tamarins: Systematics, Behaviour, and*  
660 *Ecology*. Oxford University Press; 1993:262-272.
- 661 29. Kap YS, Bus-Spoor C, van Driel N, et al. Targeted Diet Modification Reduces Multiple  
662 Sclerosis-like Disease in Adult Marmoset Monkeys from an Outbred Colony. *J Immunol*.  
663 2018;201(11):3229-3243. doi:10.4049/jimmunol.1800822
- 664 30. Ross CN, Austad S, Brasky K, et al. The development of a specific pathogen free (SPF)  
665 barrier colony of marmosets (*Callithrix jacchus*) for aging research. *Aging (Albany NY)*.  
666 2017;9(12):2544-2558. doi:10.18632/aging.101340
- 667 31. Reveles KR, Patel S, Forney L, Ross CN. Age-related changes in the marmoset gut  
668 microbiome. *Am J Primatol*. 2019;81(2). doi:10.1002/ajp.22960
- 669 32. Artim SC, Sheh A, Burns MA, Fox JG. Evaluating rectal swab collection method for gut  
670 microbiome analysis in the common marmoset (*Callithrix jacchus*). *PLoS One*.  
671 2019;14(11). doi:10.1371/journal.pone.0224950
- 672 33. Kobayashi R, Nagaoka K, Nishimura N, et al. Comparison of the fecal microbiota of two  
673 monogastric herbivorous and five omnivorous mammals. *Anim Sci J*. 2020;91(1):e13366.  
674 doi:10.1111/asj.13366
- 675 34. Zhu L, Clayton JB, Suhr Van Haute MJ, et al. Sex Bias in Gut Microbiome Transmission  
676 in Newly Paired Marmosets ( *Callithrix jacchus* ) . *mSystems*. 2020;5(2).  
677 doi:10.1128/msystems.00910-19
- 678 35. Uzal FA, Navarro MA, Li J, Freedman JC, Shrestha A, McClane BA. Comparative  
679 pathogenesis of enteric clostridial infections in humans and animals. *Anaerobe*.  
680 2018;53:11-20. doi:10.1016/j.anaerobe.2018.06.002
- 681 36. Mazuet C, Legeay C, Sautereau J, et al. Characterization of *Clostridium Baratii* Type F  
682 Strains Responsible for an Outbreak of Botulism Linked to Beef Meat Consumption in  
683 France. *PLoS Curr*. 2017;9.  
684 doi:10.1371/currents.outbreaks.6ed2fe754b58a5c42d0c33d586ffc606
- 685 37. Duvallat C, Gibbons SM, Gurry T, Irizarry RA, Alm EJ. Meta-analysis of gut microbiome  
686 studies identifies disease-specific and shared responses. *Nat Commun*. 2017;8(1):1-10.  
687 doi:10.1038/s41467-017-01973-8
- 688 38. Arumugam M, Raes J, Pelletier E, et al. Enterotypes of the human gut microbiome.  
689 *Nature*. 2011;473(7346):174-180. doi:10.1038/nature09944
- 690 39. Potkay S. Diseases of the Callitrichidae: a review. *J Med Primatol*. 1992;21(4):189-236.  
691 Accessed July 13, 2020. <https://europepmc.org/article/med/1527793>
- 692 40. McKenzie VJ, Jin Song S, Delsuc F, et al. The Effects of Captivity on the Mammalian Gut  
693 Microbiome Society for Integrative and Comparative Biology. *Integr Comp Biol*.  
694 2017;57(4):690-704. doi:10.1093/icb/ix090



- 695 41. Kovatcheva-Datchary P, Nilsson A, Akrami R, et al. Dietary Fiber-Induced Improvement  
696 in Glucose Metabolism Is Associated with Increased Abundance of Prevotella. *Cell*  
697 *Metab.* 2015;22(6):971-982. doi:10.1016/j.cmet.2015.10.001
- 698 42. David LA, Maurice CF, Carmody RN, et al. Diet rapidly and reproducibly alters the  
699 human gut microbiome. *Nature.* 2014;505(7484):559-563. doi:10.1038/nature12820
- 700 43. Louis P, Hold GL, Flint HJ. The gut microbiota, bacterial metabolites and colorectal  
701 cancer. *Nat Rev Microbiol.* 2014;12(10):661-672. doi:10.1038/nrmicro3344
- 702 44. Tsukahara T, Koyama H, Okada M, Ushida K. Stimulation of butyrate production by  
703 gluconic acid in batch culture of pig cecal digesta and identification of butyrate-producing  
704 bacteria - PubMed. *J Nutr.* 2002;132(8):2229-2234. Accessed July 13, 2020.  
705 <https://pubmed.ncbi.nlm.nih.gov/12163667/>
- 706 45. Albert K, Rani A, Sela DA. The comparative genomics of *Bifidobacterium callitrichos*  
707 reflects dietary carbohydrate utilization within the common marmoset gut. *Microb*  
708 *genomics.* 2018;4(6). doi:10.1099/mgen.0.000183
- 709 46. Cooper RE, Mangus L, Wright J, Lamendella R, Mankowski J. Abstracts of Scientific  
710 Presentations 2019 AALAS National Meeting: PS59 Gut Microbiota Alterations in  
711 Marmoset Wasting Syndrome: A Cross-Population Study. *J Am Assoc Lab Anim Sci.*  
712 2019;58(5):607-726. Accessed July 13, 2020.  
713 <https://www.ncbi.nlm.nih.gov/pmc/articles/PMC6774462/>
- 714 47. Pinheiro HLN, Mendes Pontes AR. Home range, diet, and activity patterns of common  
715 marmosets (*Callithrix jacchus*) in very small and isolated fragments of the Atlantic forest  
716 of northeastern Brazil. *Int J Ecol.* 2015;2015. doi:10.1155/2015/685816
- 717 48. Clayton JB, Vangay P, Huang H, et al. Captivity humanizes the primate microbiome. *Proc*  
718 *Natl Acad Sci U S A.* 2016;113(37):10376-10381. doi:10.1073/pnas.1521835113
- 719 49. Malnick H, Williams K, Phil-Ebosie J, Levy AS. Description of a medium for isolating  
720 *Anaerobiospirillum* spp., a possible cause of zoonotic disease, from diarrheal feces and  
721 blood of humans and use of the medium in a survey of human, canine, and feline feces. *J*  
722 *Clin Microbiol.* 1990;28(6):1380-1384. doi:10.1128/jcm.28.6.1380-1384.1990
- 723 50. Yasuda M, Inoue T, Ueno M, et al. A case of nontraumatic gas gangrene in a common  
724 marmoset (*Callithrix jacchus*). *J Vet Med Sci.* 2016;77(12):1673-1676.  
725 doi:10.1292/jvms.15-0210
- 726 51. Christie RJ, King RE. Acute gastric dilatation and rupture in *Macaca arctoides* associated  
727 with *Clostridium perfringens*. *J Med Primatol.* 1981;10(4-5):263-264.  
728 doi:10.1159/000460083
- 729 52. Meier TR, Myers , Daniel D, Eaton KA, Ko MH, Hankenson FC. Gangrenous *Clostridium*  
730 *perfringens* Infection and Subsequent Wound Management in a Rhesus Macaque (*Macaca*  
731 *mulatta*). *J Am Assoc Lab Anim Sci.* 2007;46(4):68-73.
- 732 53. Holland D, Thomson L, Mahmoudzadeh N, Khaled A. Estimating deaths from foodborne  
733 disease in the UK for 11 key pathogens. *BMJ Open Gastroenterol.* 2020;7(1):e000377.  
734 doi:10.1136/bmjgast-2020-000377

- 735 54. De La Cochetière MF, Piloquet H, Des Robert C, Darmaun D, Galmiche JP, Rozé JC.  
736 Early intestinal bacterial colonization and necrotizing enterocolitis in premature infants:  
737 The putative role of Clostridium. *Pediatr Res*. 2004;56(3):366-370.  
738 doi:10.1203/01.PDR.0000134251.45878.D5
- 739 55. Janik JS, Ein SH, Mancor K. Intestinal stricture after necrotizing enterocolitis. *J Pediatr*  
740 *Surg*. 1981;16(4):438-443. doi:10.1016/S0022-3468(81)80002-4
- 741 56. Phad N, Trivedi A, Todd D, Lakkundi A. Intestinal strictures post-necrotising  
742 enterocolitis: clinical profile and risk factors. *J neonatal Surg*. 2014;3(4):44.  
743 doi:10.21699/jns.v3i4.184
- 744 57. Neu J, Pammi M. Necrotizing enterocolitis: The intestinal microbiome, metabolome and  
745 inflammatory mediators. *Semin Fetal Neonatal Med*. 2018;23(6):400-405.  
746 doi:10.1016/j.siny.2018.08.001
- 747 58. Ridlon JM, Kang DJ, Hylemon PB. Bile salt biotransformations by human intestinal  
748 bacteria. *J Lipid Res*. 2006;47(2):241-259. doi:10.1194/jlr.R500013-JLR200
- 749 59. Wang S, Martins R, Sullivan MC, et al. Diet-induced remission in chronic enteropathy is  
750 associated with altered microbial community structure and synthesis of secondary bile  
751 acids. *Microbiome*. 2019;7(1):1-20. doi:10.1186/s40168-019-0740-4
- 752 60. Patel RM, Knezevic A, Shenvi N, et al. Association of red blood cell transfusion, anemia,  
753 and necrotizing enterocolitis in very low-birth-weight infants. *JAMA - J Am Med Assoc*.  
754 2016;315(9):889-897. doi:10.1001/jama.2016.1204
- 755 61. Manni M, Valero JG. Lipidomic profile of GM95 cell death induced by Clostridium  
756 perfringens alpha- toxin. 2017;(January). doi:10.1016/j.chemphyslip.2017.01.002
- 757 62. Joossens M, Huys G, Cnockaert M, et al. Dysbiosis of the faecal microbiota in patients  
758 with Crohn's disease and their unaffected relatives. *Gut*. 2011;60(5):631-637.  
759 doi:10.1136/gut.2010.223263
- 760 63. Paramsothy S, Nielsen S, Kamm MA, et al. Specific Bacteria and Metabolites Associated  
761 With Response to Fecal Microbiota Transplantation in Patients With Ulcerative Colitis.  
762 *Gastroenterology*. 2019;156(5):1440-1454.e2. doi:10.1053/j.gastro.2018.12.001
- 763 64. Hyams JS, Davis Thomas S, Gotman N, et al. Clinical and biological predictors of  
764 response to standardised paediatric colitis therapy (PROTECT): a multicentre inception  
765 cohort study. *Lancet*. 2019;393(10182):1708-1720. doi:10.1016/S0140-6736(18)32592-3
- 766 65. Moon C, Baldrige MT, Wallace MA, Burnham CAD, Virgin HW, Stappenbeck TS.  
767 Vertically transmitted faecal IgA levels determine extra-chromosomal phenotypic  
768 variation. *Nature*. 2015;521(7550):90-93. doi:10.1038/nature14139
- 769 66. Connors J, Dunn KA, Allott J, et al. The relationship between fecal bile acids and  
770 microbiome community structure in pediatric Crohn's disease. *ISME J*. 2020;14(3):702-  
771 713. doi:10.1038/s41396-019-0560-3
- 772 67. Hehemann JH, Correc G, Barbeyron T, Helbert W, Czjzek M, Michel G. Transfer of  
773 carbohydrate-active enzymes from marine bacteria to Japanese gut microbiota. *Nature*.



- 774 2010;464(7290):908-912. doi:10.1038/nature08937
- 775 68. Wexler HM. Bacteroides: The good, the bad, and the nitty-gritty. *Clin Microbiol Rev.*  
776 2007;20(4):593-621. doi:10.1128/CMR.00008-07
- 777 69. Delday M, Mulder I, Logan E, Grant G. Bacteroides thetaiotaomicron Ameliorates Colon  
778 Inflammation in Preclinical Models of Crohn's Disease. *Inflamm Bowel Dis.* 2019;25(1).  
779 doi:10.1093/IBD/IZY281
- 780 70. Bloom SM, Bijanki VN, Nava GM, et al. Commensal Bacteroides species induce colitis in  
781 host-genotype-specific fashion in a mouse model of inflammatory bowel disease. *Cell*  
782 *Host Microbe.* 2011;9(5):390-403. doi:10.1016/j.chom.2011.04.009
- 783 71. Lucke K, Miehlke S, Jacobs E, Schuppler M. Prevalence of Bacteroides and Prevotella  
784 spp. in ulcerative colitis. *J Med Microbiol.* 2006;55(5):617-624.  
785 doi:10.1099/jmm.0.46198-0
- 786 72. Swidsinski A, Ladhoff A, Pernthaler A, et al. Mucosal flora in inflammatory bowel  
787 disease. *Gastroenterology.* 2002;122(1):44-54. doi:10.1053/gast.2002.30294
- 788 73. Larsen JM. The immune response to Prevotella bacteria in chronic inflammatory disease.  
789 *Immunology.* 2017;151(4):363-374. doi:10.1111/imm.12760
- 790 74. Scher JU, Sczesnak A, Longman RS, et al. Expansion of intestinal Prevotella copri  
791 correlates with enhanced susceptibility to arthritis. *Elife.* 2013;2013(2).  
792 doi:10.7554/eLife.01202.001
- 793 75. Pianta A, Arvikar S, Strle K, et al. Evidence of the Immune Relevance of Prevotella copri,  
794 a Gut Microbe, in Patients With Rheumatoid Arthritis. *Arthritis Rheumatol.*  
795 2017;69(5):964-975. doi:10.1002/art.40003
- 796 76. de Aquino SG, Abdollahi-Roodsaz S, Koenders MI, et al. Periodontal Pathogens Directly  
797 Promote Autoimmune Experimental Arthritis by Inducing a TLR2- and IL-1–Driven Th17  
798 Response. *J Immunol.* 2014;192(9):4103-4111. doi:10.4049/jimmunol.1301970
- 799 77. Maeda Y, Kurakawa T, Umemoto E, et al. Dysbiosis Contributes to Arthritis  
800 Development via Activation of Autoreactive T Cells in the Intestine. *Arthritis Rheumatol.*  
801 2016;68(11):2646-2661. doi:10.1002/art.39783
- 802 78. Elinav E, Strowig T, Kau AL, et al. NLRP6 inflammasome regulates colonic microbial  
803 ecology and risk for colitis. *Cell.* 2011;145(5):745-757. doi:10.1016/j.cell.2011.04.022
- 804 79. Su T, Liu R, Lee A, et al. Altered Intestinal Microbiota With Increased Abundance of  
805 Prevotella Is Associated With High Risk of Diarrhea-Predominant Irritable Bowel  
806 Syndrome. *Gastroenterol Res Pract.* 2018;2018. doi:10.1155/2018/6961783
- 807 80. Vázquez-Castellanos JF, Serrano-Villar S, Latorre A, et al. Altered metabolism of gut  
808 microbiota contributes to chronic immune activation in HIV-infected individuals. *Mucosal*  
809 *Immunol.* 2015;8(4):760-772. doi:10.1038/mi.2014.107
- 810 81. Rey J, Giustiniani J, Mallet F, et al. The co-expression of 2B4 (CD244) and CD160  
811 delineates an subpopulation of human CD8+ T cells with a potent CD160-mediated

- 812 cytolytic effector function. *Eur J Immunol.* 2006;36(9):2359-2366.  
813 doi:10.1002/eji.200635935
- 814 82. Bloch-Queyrat C, Fondanèche MC, Chen R, et al. Regulation of natural cytotoxicity by  
815 the adaptor SAP and the Src-related kinase Fyn. *J Exp Med.* 2005;202(1):181-192.  
816 doi:10.1084/jem.20050449
- 817 83. Poggi A, Benelli R, Venè R, et al. Human gut-associated natural killer cells in health and  
818 disease. *Front Immunol.* 2019;10(MAY):961. doi:10.3389/fimmu.2019.00961
- 819 84. Fox JG, Dangler CA, Taylor NS, King A, Koh TJ, Wang TC. High-Salt Diet Induces  
820 Gastric Epithelial Hyperplasia and Parietal Cell Loss, and Enhances Helicobacter pylori  
821 Colonization in C57BL/6 Mice | Cancer Research. *Cancer Res.* 1999;59(19):4823-4828.
- 822 85. Comeau AM, Douglas GM, Langille MGI. Microbiome Helper: a Custom and  
823 Streamlined Workflow for Microbiome Research. *mSystems.* 2017;2(1):e00127-16.  
824 doi:10.1128/mSystems.00127-16
- 825 86. Andrews S. FastQC A Quality Control tool for High Throughput Sequence Data.  
826 Published 2010. Accessed August 4, 2020.  
827 <http://www.bioinformatics.babraham.ac.uk/projects/fastqc/>
- 828 87. Bolyen E, Rideout JR, Dillon MR, et al. Reproducible, interactive, scalable and extensible  
829 microbiome data science using QIIME 2. *Nat Biotechnol.* 2019;37(8):852-857.  
830 doi:10.1038/s41587-019-0209-9
- 831 88. Martin M. Cutadapt removes adapter sequences from high-throughput sequencing reads.  
832 *EMBnet.journal.* 2011;17(1):10. doi:10.14806/ej.17.1.200
- 833 89. Yilmaz P, Wegener Parfrey L, Yarza P, et al. SILVA and “All-species Living Tree Project  
834 (LTP)” taxonomic frameworks | Nucleic Acids Research | Oxford Academic. *Nucleic  
835 Acids Res.* 2014;42(D1):D643-D648.
- 836 90. Mandal S, Van Treuren W, White RA, Eggesbø M, Knight R, Peddada SD. Analysis of  
837 composition of microbiomes: a novel method for studying microbial composition. *Microb  
838 Ecol Heal Dis.* 2015;26(0). doi:10.3402/mehd.v26.27663
- 839 91. Lozupone C, Hamady M, Knight R. UniFrac--an online tool for comparing microbial  
840 community diversity in a phylogenetic context. *BMC Bioinformatics.* 2006;7(1):371.  
841 doi:10.1186/1471-2105-7-371
- 842 92. Wickham H. ggplot2: elegant graphics for data analysis. *Springer*; . Published online 2009.
- 843 93. Kuhn M. Building predictive models in R using the caret package. *J Stat Softw.*  
844 2008;28(5):1-26. doi:10.18637/jss.v028.i05
- 845 94. Oksanen J, Kindt R, Legendre P, et al. The vegan Package. Published online 2008.  
846 Accessed August 4, 2020. <http://cran.r-project.org/>,
- 847 95. Robin X, Turck N, Hainard A, et al. pROC: An open-source package for R and S+ to  
848 analyze and compare ROC curves. *BMC Bioinformatics.* 2011;12(1):77.  
849 doi:10.1186/1471-2105-12-77

- 850 96. Warns Gregory, Bolker Ben LT. gtools: Various R Programming Tools. Published online  
851 2015.
- 852 97. Lee CM, Barber GP, Casper J, et al. UCSC Genome Browser enters 20th year. *Nucleic  
853 Acids Res.* 2020;48. doi:10.1093/nar/gkz1012
- 854 98. Liao Y, Smyth GK, Shi W. The R package Rsubread is easier, faster, cheaper and better  
855 for alignment and quantification of RNA sequencing reads. *Nucleic Acids Res.*  
856 2019;47(8). doi:10.1093/nar/gkz114
- 857 99. Robinson MD, Mccarthy DJ, Smyth GK. edgeR: a Bioconductor package for differential  
858 expression analysis of digital gene expression data. *Bioinforma Appl NOTE.*  
859 2010;26(1):139-140. doi:10.1093/bioinformatics/btp616
- 860 100. Mccarthy DJ, Chen Y, Smyth GK. Differential expression analysis of multifactor RNA-  
861 Seq experiments with respect to biological variation. *Nucleic Acids Res.* 2012;40:4288-  
862 4297. doi:10.1093/nar/gks042
- 863 101. Ritchie ME, Phipson B, Wu D, et al. limma powers differential expression analyses for  
864 RNA-sequencing and microarray studies. *Nucleic Acids Res.* 2015;43(7).  
865 doi:10.1093/nar/gkv007
- 866 102. Pagès H, Carlson M, Falcon S, Li N. AnnotationDbi: Manipulation of SQLite-based  
867 annotations in Bioconductor. R package. Published online 2019.
- 868 103. Carlson M. GO.db: A set of annotation maps describing the entire Gene Ontology. R  
869 package. Published online 2019.
- 870 104. Alexa A, Rahnenfuhrer J. topGO: Enrichment Analysis for Gene Ontology. R package.  
871 Published online 2019.
- 872 105. Mark A, Thompson R, Afrasiabi C, Wu C. mygene: Access MyGene.Info\_ services. R  
873 package version. Published online 2019.
- 874 106. Hansen KD, Gentry J, Long L, et al. Rgraphviz: Provides plotting capabilities for R graph  
875 objects. R package. Published online 2019.
- 876 107. Zeileis A, Fisher JC, Hornik K, et al. colorspace: A Toolbox for Manipulating and  
877 Assessing Colors and Palettes. Published online March 14, 2019. Accessed August 4,  
878 2020. <http://arxiv.org/abs/1903.06490>
- 879 108. Gao C-H. ggVennDiagram: A “ggplot” Implement of Venn Diagram. R package.  
880 Published online 2019. <https://cran.r-project.org/package=ggVennDiagram>

Figure 1

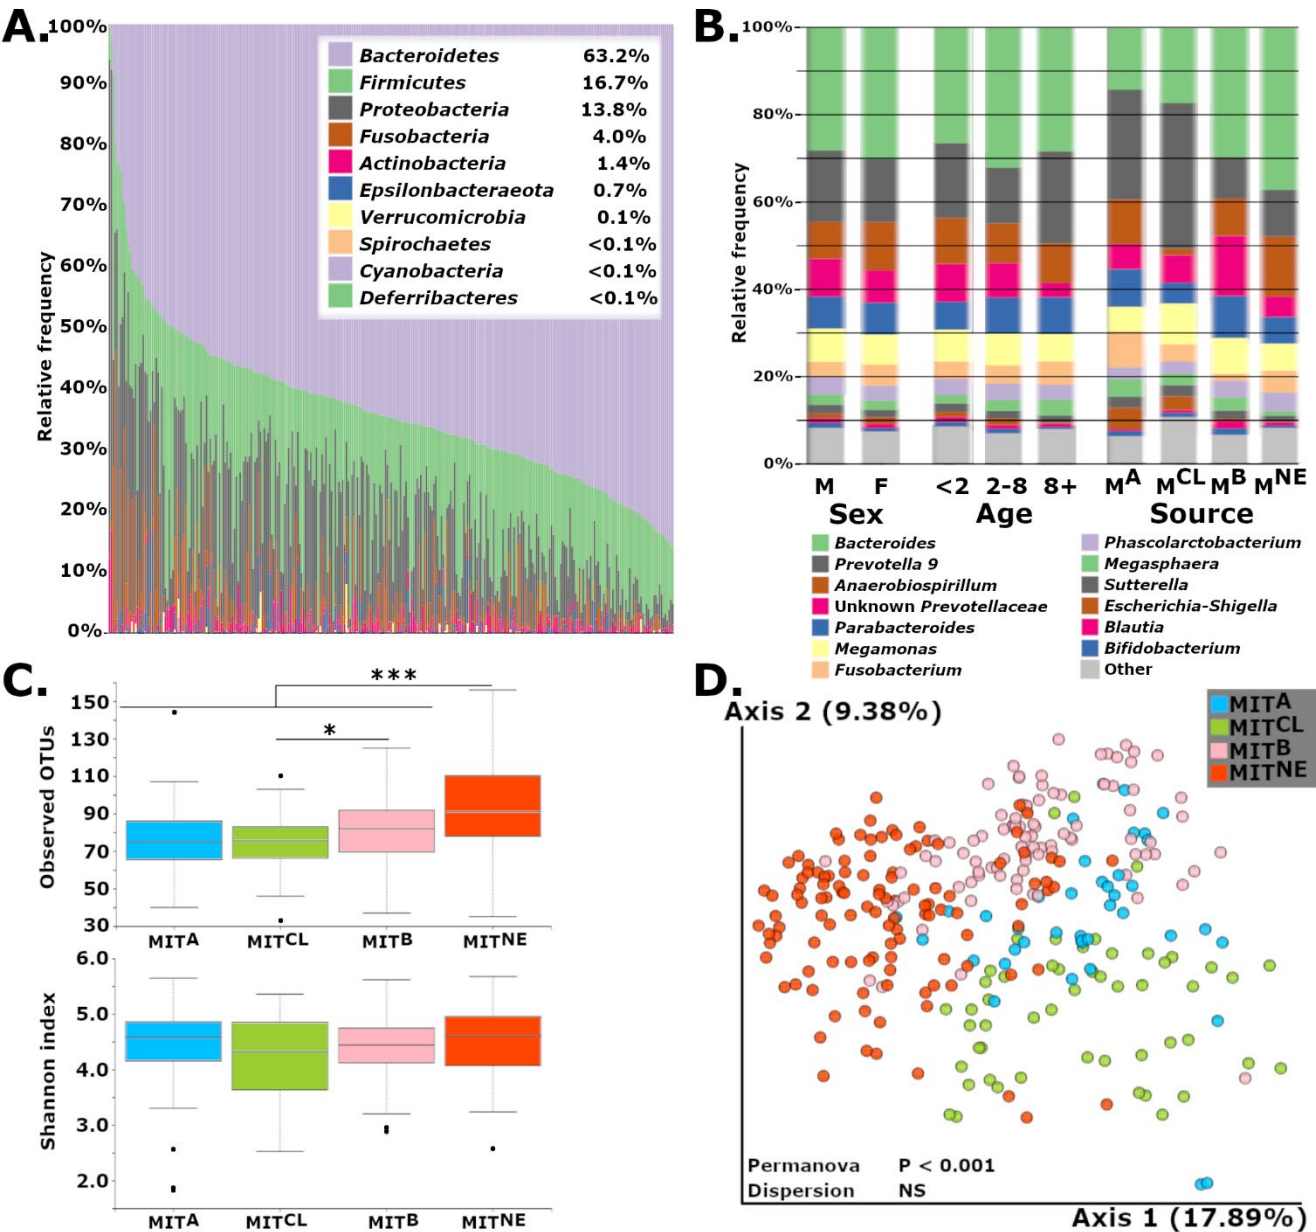

Figure 1. A) Gut microbiome profiles of healthy, common marmosets at the phylum level exhibit a *Bacteroidetes*-dominant and human-like microbiome. B) Averaged relative abundances at the genus level show differences associated with source but few differences based on sex or age. C) Observed OTUs were increased in MIT<sup>NE</sup> vs. all sources and MIT<sup>B</sup> compared to MIT<sup>A</sup> and MIT<sup>CL</sup>, but metrics involving evenness, such as Shannon's diversity index, showed no difference. \*,  $P < 0.05$ ; \*\*,  $P < 0.01$  and \*\*\*,  $P < 0.001$ . D) PCoA plot using Unweighted UniFrac metric shows clustering of microbiome profiles based on marmoset source.



Figure 2

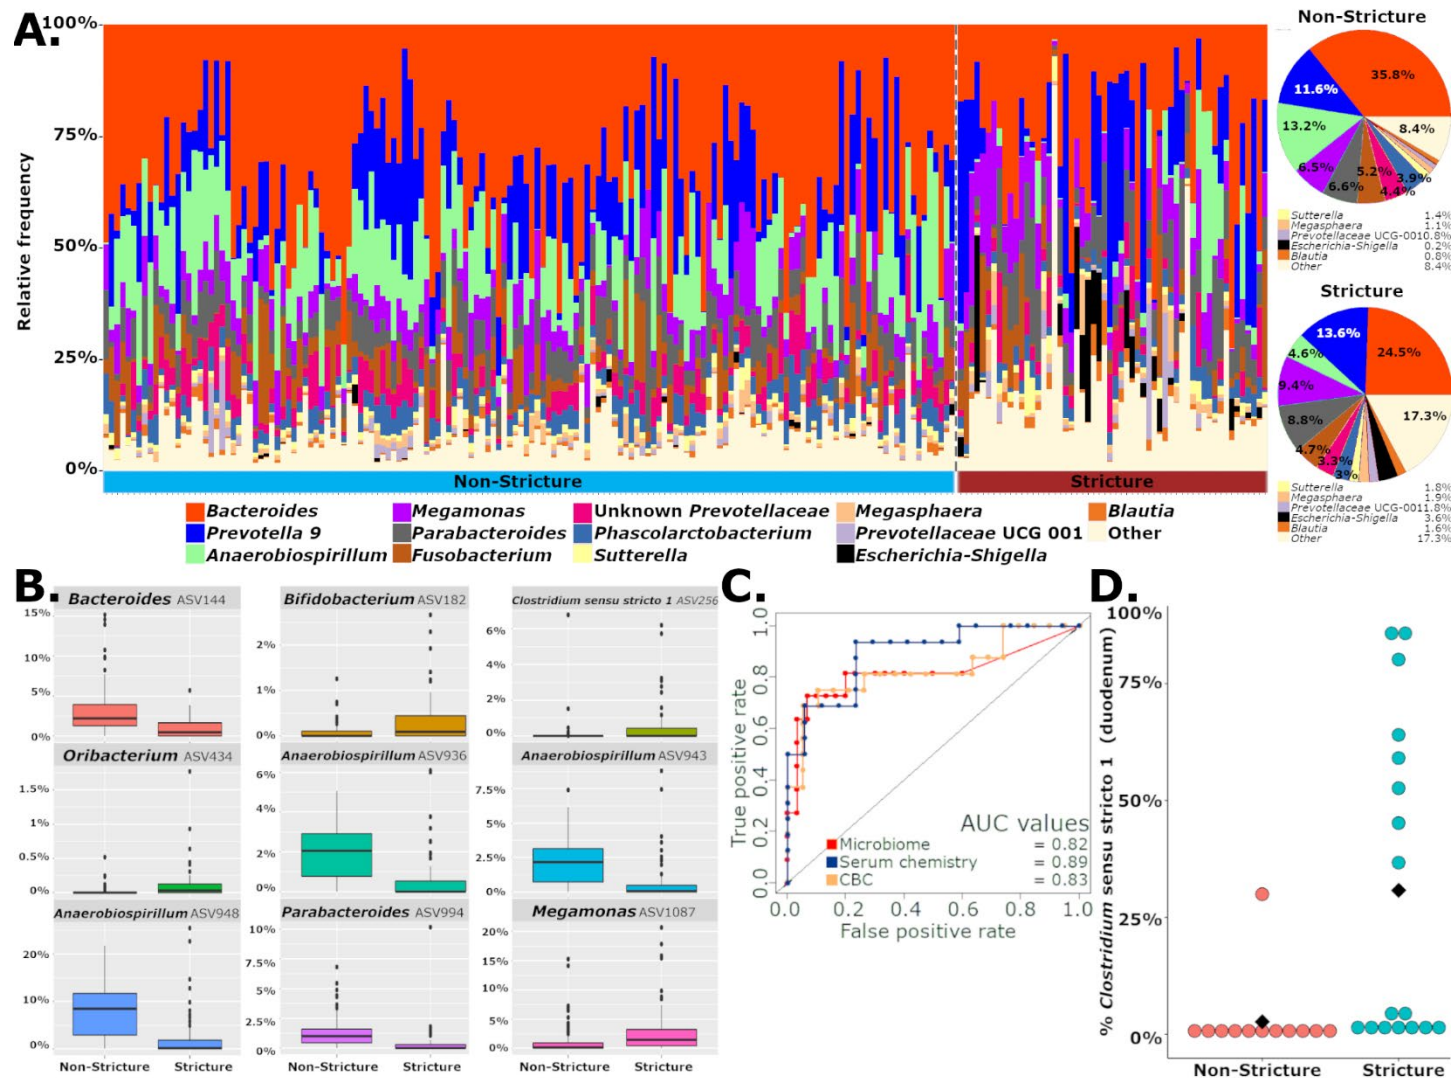

Figure 2. A) Microbiome composition of samples at the genus level and pie charts with average bacterial abundances of stricture progressors and non-progressors show dysbiosis associated with stricture characterized by decreased *Bacteroides* and *Anaerobiospirillum* and increased *Megamonas*. B) Nine ASVs identified by a random forest model that can correctly classify stricture and non-stricture samples with a 85% accuracy. C) Area under the curve (AUC) of receiver operating characteristic (ROC) curves for random forest models using microbiome, serum chemistry or complete blood count show strong performance of models in classifying strictures and non-strictures. D) Relative abundance of *Clostridium sensu stricto 1* reads in duodenal biopsies is increased in stricture cases compared to non-stricture cases.

Figure 3

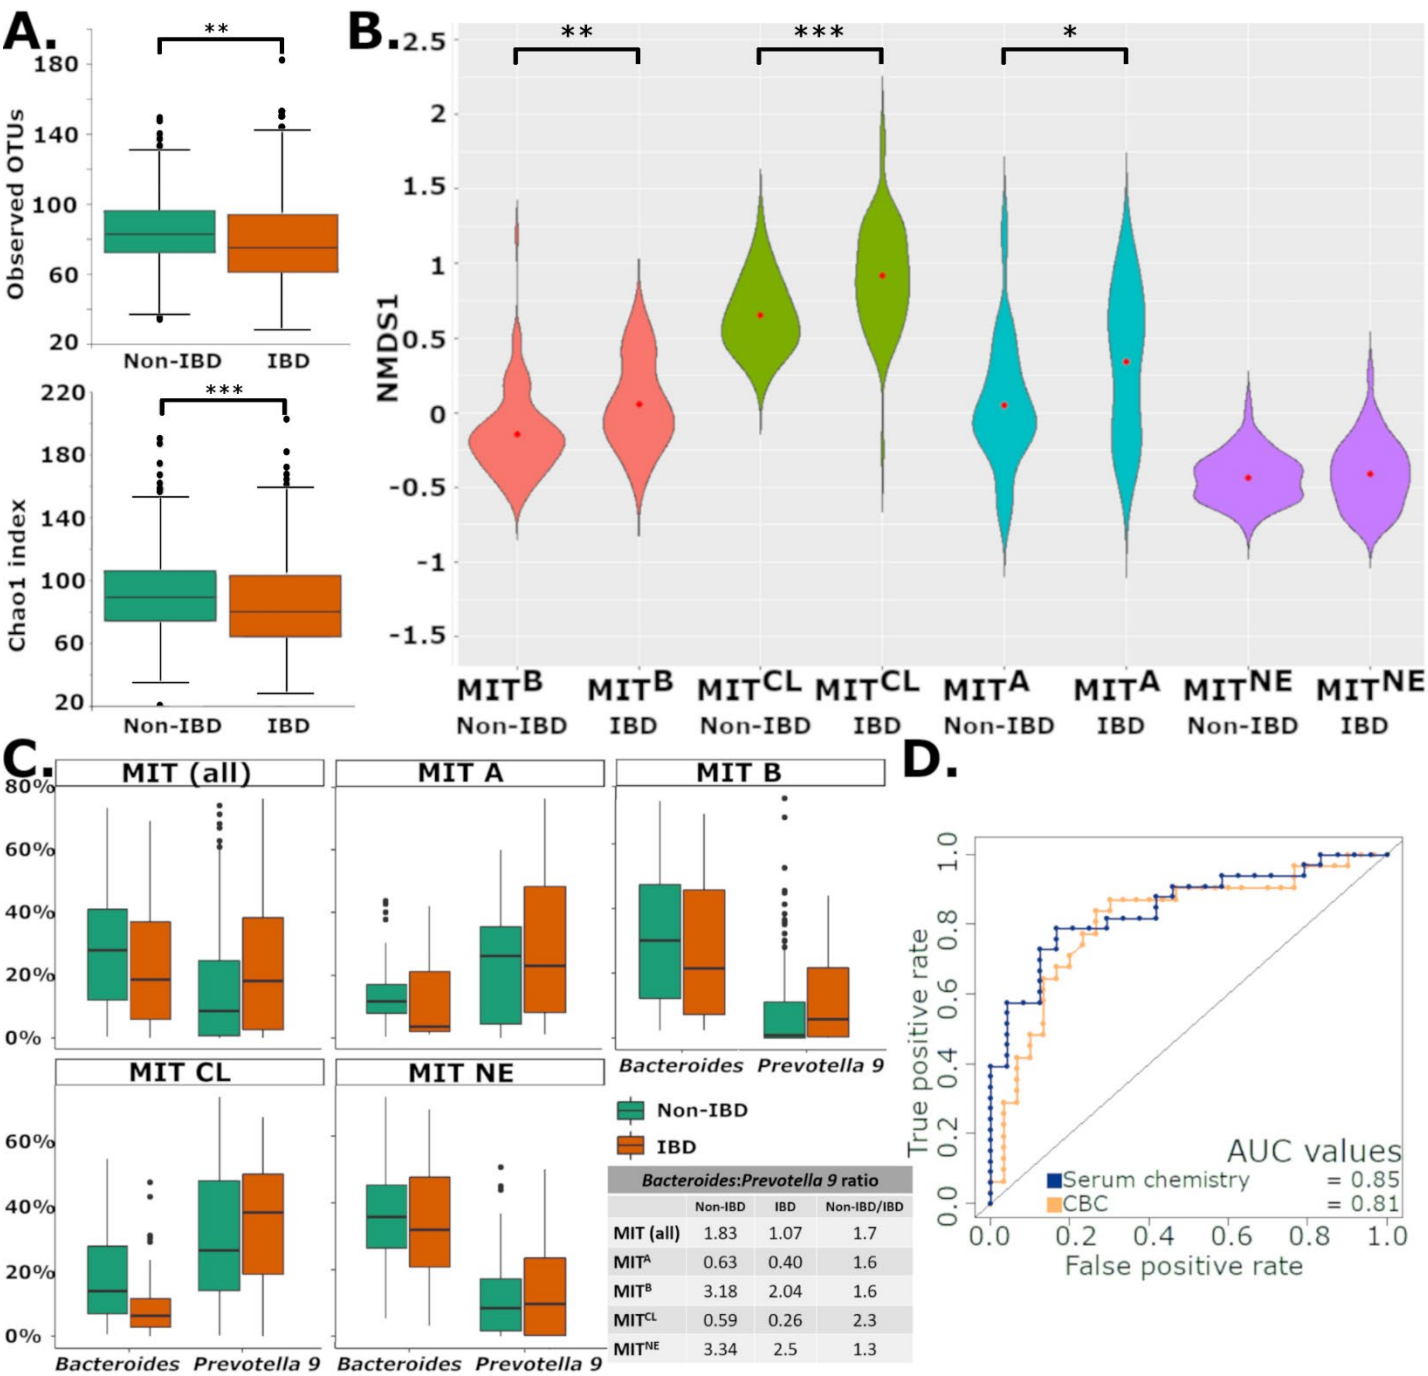

Figure 3. A) Decreased richness was observed in IBD marmosets (Observed OTUs and Chao1) compared to non-IBD marmosets similar to what is observed in humans. B) Increases in PC1 relative to source-specific, non-IBD controls were observed in 3 of 4 sources. C) *Bacteroides* and *Prevotella 9* levels are shown by source and IBD status. A lower overall and source-specific *Bacteroides:Prevotella 9* ratio is observed in IBD cases regardless of source-specific differences in abundances of these two genera. D) AUC of ROC for random forest models using serum chemistry and CBC show strong performance of models in classifying IBD progressors and non-progressors. \*,  $P < 0.05$ ; \*\*,  $P < 0.01$  and \*\*\*,  $P < 0.001$ .

Figure 4

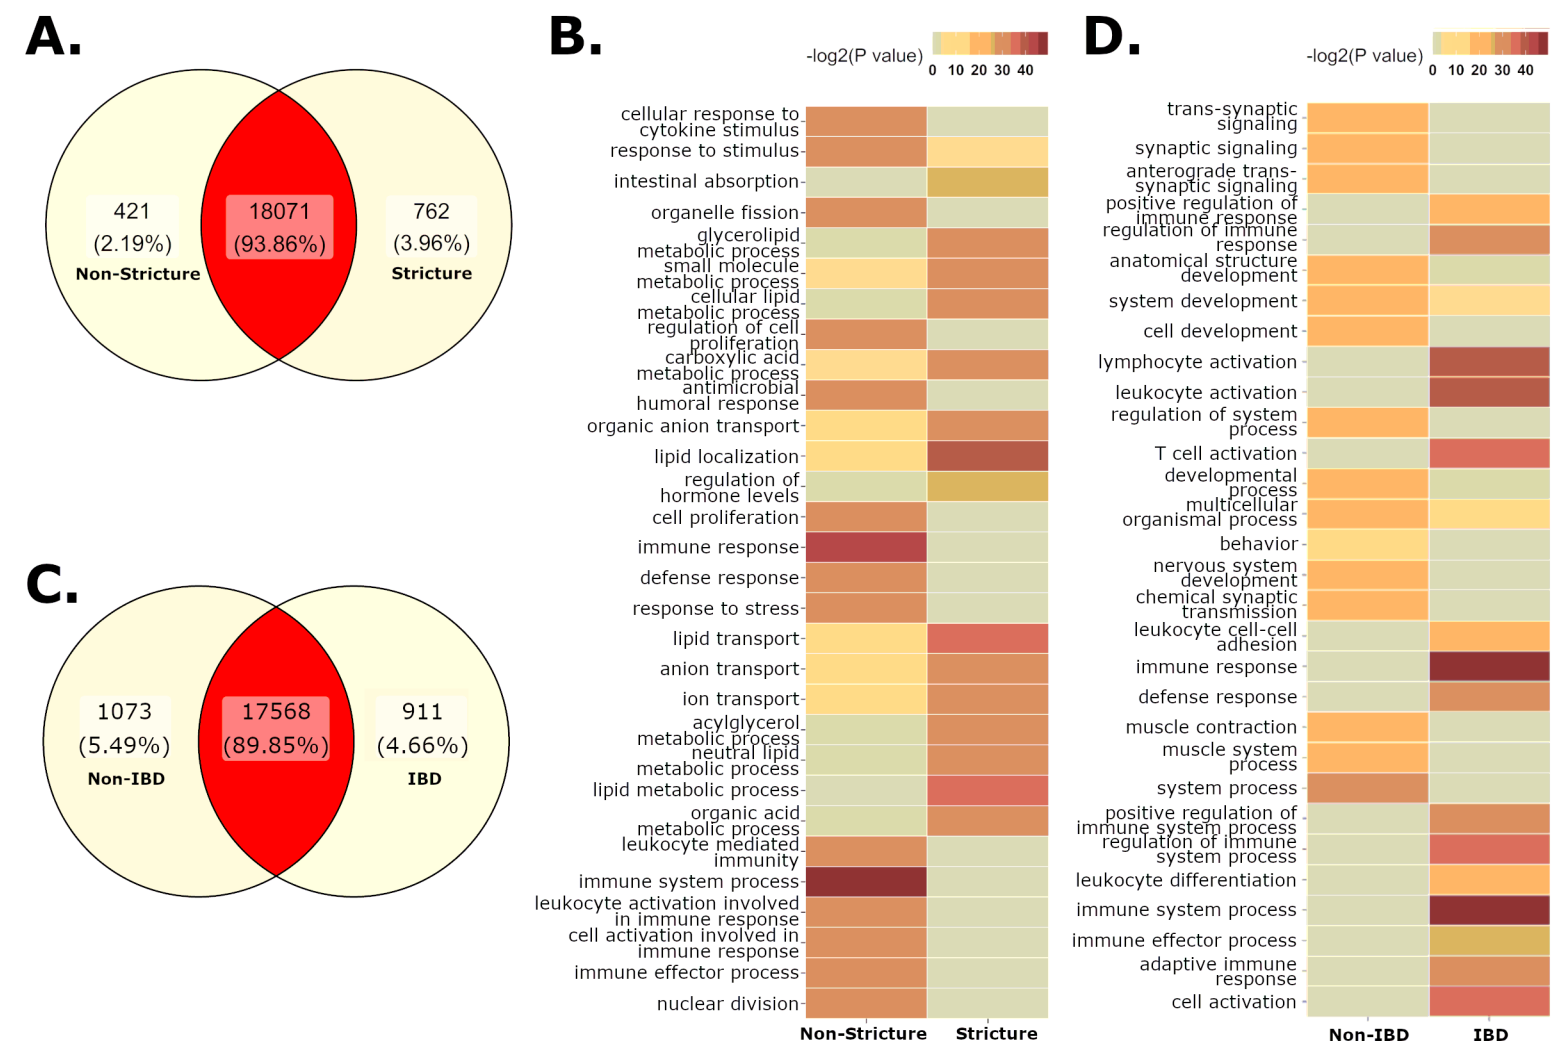

Figure 4. A) Differentially expressed genes (DEG)(FDR <0.05) in the duodenum of non-stricture and stricture cases. B) Gene ontology (GO) sets enriched in stricture cases show upregulation of lipid metabolism, transport and localization. Non-stricture cases have enrichment of immune processes, possibly due to underlying pathology caused by IBD. C) DEG (FDR <0.05) in the jejunum of non-IBD and IBD cases. D) IBD samples are enrich GO sets associated with immunity and immune cell activation.

| Table 1. Samples used |                   |         |           |     |
|-----------------------|-------------------|---------|-----------|-----|
|                       |                   | Healthy | Stricture | IBD |
| Sex                   | Male              | 156     | 25        | 95  |
|                       | Female            | 147     | 37        | 105 |
| Age                   | 2 and under       | 145     | 19        | 36  |
|                       | 2 to 8            | 139     | 42        | 131 |
|                       | Over 8            | 19      | 1         | 33  |
| Type                  | Rectal            | 207     | 24        | 111 |
|                       | Fecal             | 96      | 38        | 89  |
| Source                | MIT <sup>NE</sup> | 117     | 57        | 89  |
|                       | MIT <sup>B</sup>  | 94      | 3         | 30  |
|                       | MIT <sup>CL</sup> | 53      | 2         | 61  |
|                       | MIT <sup>A</sup>  | 39      | 0         | 20  |



**Table 2. Top Gene Ontology sets in Stricture****Biological Processes upregulated in the Duodenum in Stricture**

| <b>GO ID</b> | <b>Term</b>                       | <b>Ont</b> | <b>N</b> | <b>Up</b> | <b>Down</b> | <b>P.Up</b> | <b>P.Down</b> |
|--------------|-----------------------------------|------------|----------|-----------|-------------|-------------|---------------|
| GO:0010876   | lipid localization                | BP         | 292      | 14        | 44          | 1.08E-02    | 1.39E-12      |
| GO:0006629   | lipid metabolic process           | BP         | 1097     | 27        | 99          | 4.69E-01    | 1.02E-11      |
| GO:0006869   | lipid transport                   | BP         | 262      | 13        | 39          | 1.05E-02    | 3.98E-11      |
| GO:0046486   | glycerolipid metabolic process    | BP         | 349      | 10        | 45          | 3.26E-01    | 1.70E-10      |
| GO:0044281   | small molecule metabolic process  | BP         | 1646     | 49        | 128         | 6.11E-02    | 1.80E-10      |
| GO:0044255   | cellular lipid metabolic process  | BP         | 842      | 22        | 79          | 3.65E-01    | 2.81E-10      |
| GO:0006639   | acylglycerol metabolic process    | BP         | 104      | 4         | 22          | 2.38E-01    | 1.00E-09      |
| GO:0006638   | neutral lipid metabolic process   | BP         | 105      | 4         | 22          | 0.24339141  | 1.22E-09      |
| GO:0015711   | organic anion transport           | BP         | 364      | 16        | 44          | 0.01443175  | 2.16E-09      |
| GO:0006811   | ion transport                     | BP         | 1196     | 39        | 98          | 0.02879741  | 2.79E-09      |
| GO:0006820   | anion transport                   | BP         | 459      | 19        | 50          | 0.01459     | 6.00E-09      |
| GO:0006082   | organic acid metabolic process    | BP         | 923      | 27        | 80          | 0.16158189  | 8.66E-09      |
| GO:0019752   | carboxylic acid metabolic process | BP         | 845      | 27        | 75          | 0.07620236  | 9.78E-09      |
| GO:0010817   | regulation of hormone levels      | BP         | 377      | 10        | 43          | 0.41543649  | 1.90E-08      |
| GO:0050892   | intestinal absorption             | BP         | 35       | 0         | 12          | 1           | 2.04E-08      |

**Biological processes upregulated in the Duodenum in Non-Stricture**

| <b>GO ID</b> | <b>Term</b>                                      | <b>Ont</b> | <b>N</b> | <b>Up</b> | <b>Down</b> | <b>P.Up</b> | <b>P.Down</b> |
|--------------|--------------------------------------------------|------------|----------|-----------|-------------|-------------|---------------|
| GO:0002376   | immune system process                            | BP         | 2192     | 110       | 86          | 1.24E-15    | 9.36E-01      |
| GO:0006955   | immune response                                  | BP         | 1482     | 83        | 50          | 4.21E-14    | 9.91E-01      |
| GO:0019730   | antimicrobial humoral response                   | BP         | 49       | 13        | 0           | 7.97E-11    | 1.00E+00      |
| GO:0006950   | response to stress                               | BP         | 3001     | 122       | 106         | 9.11E-11    | 9.99E-01      |
| GO:0008283   | cell proliferation                               | BP         | 1479     | 75        | 56          | 1.33E-10    | 9.35E-01      |
| GO:0000280   | nuclear division                                 | BP         | 322      | 30        | 7           | 1.81E-10    | 9.92E-01      |
| GO:0002252   | immune effector process                          | BP         | 900      | 54        | 31          | 2.54E-10    | 9.58E-01      |
| GO:0006952   | defense response                                 | BP         | 1138     | 62        | 38          | 4.85E-10    | 9.84E-01      |
| GO:0002443   | leukocyte mediated immunity                      | BP         | 598      | 41        | 21          | 1.05E-09    | 9.08E-01      |
| GO:0048285   | organelle fission                                | BP         | 357      | 30        | 8           | 2.16E-09    | 9.92E-01      |
| GO:0050896   | response to stimulus                             | BP         | 6351     | 203       | 305         | 3.03E-09    | 6.44E-02      |
| GO:0042127   | regulation of cell proliferation                 | BP         | 1226     | 63        | 47          | 3.54E-09    | 9.01E-01      |
| GO:0002366   | leukocyte activation involved in immune response | BP         | 559      | 38        | 21          | 5.77E-09    | 0.83699294    |
| GO:0002263   | cell activation involved in immune response      | BP         | 562      | 38        | 21          | 6.68E-09    | 0.84361261    |
| GO:0071345   | cellular response to cytokine stimulus           | BP         | 849      | 49        | 31          | 7.05E-09    | 0.91205517    |

**Table 3. Top Gene Ontology sets in IBD****Biological processes upregulated in the Jejunum in IBD**

| <b>GO ID</b> | <b>Term</b>                                  | <b>Ont</b> | <b>N</b> | <b>Up</b> | <b>Down</b> | <b>P.Up</b> | <b>P.Down</b> |
|--------------|----------------------------------------------|------------|----------|-----------|-------------|-------------|---------------|
| GO:0002376   | immune system process                        | BP         | 2197     | 90        | 286         | 1           | 7.30E-58      |
| GO:0006955   | immune response                              | BP         | 1473     | 39        | 227         | 1           | 7.75E-57      |
| GO:0045321   | leukocyte activation                         | BP         | 949      | 24        | 165         | 1           | 7.62E-47      |
| GO:0046649   | lymphocyte activation                        | BP         | 516      | 11        | 119         | 0.9999998   | 4.13E-46      |
| GO:0042110   | T cell activation                            | BP         | 361      | 7         | 97          | 0.9999956   | 1.32E-43      |
| GO:0002682   | regulation of immune system process          | BP         | 1154     | 40        | 177         | 0.9999999   | 1.42E-42      |
| GO:0001775   | cell activation                              | BP         | 1071     | 37        | 169         | 0.9999997   | 3.75E-42      |
| GO:0002250   | adaptive immune response                     | BP         | 282      | 3         | 81          | 0.9999995   | 9.97E-39      |
| GO:0002684   | positive regulation of immune system process | BP         | 816      | 20        | 136         | 1           | 5.02E-36      |
| GO:0050776   | regulation of immune response                | BP         | 758      | 17        | 130         | 1           | 1.07E-35      |
| GO:0006952   | defense response                             | BP         | 1139     | 48        | 161         | 0.9999512   | 6.45E-34      |
| GO:0002252   | immune effector process                      | BP         | 890      | 19        | 135         | 1           | 2.64E-31      |
| GO:0050778   | positive regulation of immune response       | BP         | 601      | 10        | 104         | 1           | 1.02E-28      |
| GO:0002521   | leukocyte differentiation                    | BP         | 402      | 9         | 83          | 0.9999927   | 2.24E-28      |
| GO:0007159   | leukocyte cell-cell adhesion                 | BP         | 254      | 6         | 64          | 0.9996237   | 4.13E-27      |

**Biological processes upregulated in the Jejunum in non-IBD**

| <b>GO ID</b> | <b>Term</b>                          | <b>Ont</b> | <b>N</b> | <b>Up</b> | <b>Down</b> | <b>P.Up</b> | <b>P.Down</b> |
|--------------|--------------------------------------|------------|----------|-----------|-------------|-------------|---------------|
| GO:0003008   | system process                       | BP         | 1229     | 204       | 64          | 3.89E-36    | 5.12E-01      |
| GO:0099537   | trans-synaptic signaling             | BP         | 538      | 105       | 20          | 8.64E-24    | 9.59E-01      |
| GO:0032501   | multicellular organismal process     | BP         | 5121     | 490       | 327         | 1.40E-23    | 7.31E-07      |
| GO:0099536   | synaptic signaling                   | BP         | 543      | 105       | 20          | 1.85E-23    | 9.63E-01      |
| GO:0048731   | system development                   | BP         | 3556     | 373       | 229         | 4.31E-23    | 7.45E-05      |
| GO:0044057   | regulation of system process         | BP         | 444      | 92        | 17          | 8.25E-23    | 9.29E-01      |
| GO:0098916   | anterograde trans-synaptic signaling | BP         | 530      | 102       | 20          | 1.23E-22    | 9.51E-01      |
| GO:0007268   | chemical synaptic transmission       | BP         | 530      | 102       | 20          | 1.23E-22    | 9.51E-01      |
| GO:0006936   | muscle contraction                   | BP         | 267      | 66        | 10          | 7.02E-21    | 8.93E-01      |
| GO:0032502   | developmental process                | BP         | 4618     | 444       | 281         | 1.20E-20    | 4.77E-04      |
| GO:0007399   | nervous system development           | BP         | 1847     | 226       | 95          | 1.33E-20    | 5.61E-01      |
| GO:0048468   | cell development                     | BP         | 1674     | 210       | 98          | 2.52E-20    | 1.09E-01      |
| GO:0048856   | anatomical structure development     | BP         | 4314     | 418       | 263         | 1.43E-19    | 7.56E-04      |
| GO:0003012   | muscle system process                | BP         | 340      | 73        | 11          | 3.50E-19    | 9.69E-01      |
| GO:0007275   | multicellular organism development   | BP         | 3945     | 389       | 245         | 4.19E-19    | 4.20E-04      |
